# Supplementary material for: Population genomics of wild Chinese rhesus macaques reveals a dynamic demographic history and local adaptation, with implications for biomedical research
Source: PubMed Central journal article supplement (PMC6143732; doi:10.1093/gigascience/giy106), 2018-08-27
Supplement: giy106_giga-d-17-00291_revision_1.pdf [file giy106_giga-d-17-00291_revision_1.pdf]

# GigaScience

## Population genomics of wild Chinese rhesus macaques reveals a dynamic demographic history and local adaptation, with implications for biomedical research --Manuscript Draft--

|                                                      |                                                                                                                                                                                                                                                                                                                                                                                                                                                                                                                                                                                                                                                                                                                                                                                                                                                                                                                                                                                                                                                                                                                                                                                                                                                                                                                                                                                                                                                                                                                                                                                                                                                                                                                                                                                                                                                                                                                                                                                                                                                                                                                                                                                                                                                                               |               |
|------------------------------------------------------|-------------------------------------------------------------------------------------------------------------------------------------------------------------------------------------------------------------------------------------------------------------------------------------------------------------------------------------------------------------------------------------------------------------------------------------------------------------------------------------------------------------------------------------------------------------------------------------------------------------------------------------------------------------------------------------------------------------------------------------------------------------------------------------------------------------------------------------------------------------------------------------------------------------------------------------------------------------------------------------------------------------------------------------------------------------------------------------------------------------------------------------------------------------------------------------------------------------------------------------------------------------------------------------------------------------------------------------------------------------------------------------------------------------------------------------------------------------------------------------------------------------------------------------------------------------------------------------------------------------------------------------------------------------------------------------------------------------------------------------------------------------------------------------------------------------------------------------------------------------------------------------------------------------------------------------------------------------------------------------------------------------------------------------------------------------------------------------------------------------------------------------------------------------------------------------------------------------------------------------------------------------------------------|---------------|
| <b>Manuscript Number:</b>                            | GIGA-D-17-00291R1                                                                                                                                                                                                                                                                                                                                                                                                                                                                                                                                                                                                                                                                                                                                                                                                                                                                                                                                                                                                                                                                                                                                                                                                                                                                                                                                                                                                                                                                                                                                                                                                                                                                                                                                                                                                                                                                                                                                                                                                                                                                                                                                                                                                                                                             |               |
| <b>Full Title:</b>                                   | Population genomics of wild Chinese rhesus macaques reveals a dynamic demographic history and local adaptation, with implications for biomedical research                                                                                                                                                                                                                                                                                                                                                                                                                                                                                                                                                                                                                                                                                                                                                                                                                                                                                                                                                                                                                                                                                                                                                                                                                                                                                                                                                                                                                                                                                                                                                                                                                                                                                                                                                                                                                                                                                                                                                                                                                                                                                                                     |               |
| <b>Article Type:</b>                                 | Research                                                                                                                                                                                                                                                                                                                                                                                                                                                                                                                                                                                                                                                                                                                                                                                                                                                                                                                                                                                                                                                                                                                                                                                                                                                                                                                                                                                                                                                                                                                                                                                                                                                                                                                                                                                                                                                                                                                                                                                                                                                                                                                                                                                                                                                                      |               |
| <b>Funding Information:</b>                          | Strategic Priority Research Program of the Chinese Academy of Sciences (XDPB0202)                                                                                                                                                                                                                                                                                                                                                                                                                                                                                                                                                                                                                                                                                                                                                                                                                                                                                                                                                                                                                                                                                                                                                                                                                                                                                                                                                                                                                                                                                                                                                                                                                                                                                                                                                                                                                                                                                                                                                                                                                                                                                                                                                                                             | Dr Ming Li    |
|                                                      | NSFC (31530068)                                                                                                                                                                                                                                                                                                                                                                                                                                                                                                                                                                                                                                                                                                                                                                                                                                                                                                                                                                                                                                                                                                                                                                                                                                                                                                                                                                                                                                                                                                                                                                                                                                                                                                                                                                                                                                                                                                                                                                                                                                                                                                                                                                                                                                                               | Dr Ming Li    |
|                                                      | NSFC (31471989)                                                                                                                                                                                                                                                                                                                                                                                                                                                                                                                                                                                                                                                                                                                                                                                                                                                                                                                                                                                                                                                                                                                                                                                                                                                                                                                                                                                                                                                                                                                                                                                                                                                                                                                                                                                                                                                                                                                                                                                                                                                                                                                                                                                                                                                               | Dr Zhijin Liu |
|                                                      | National Key R&D Program of China (2016YFC0503200)                                                                                                                                                                                                                                                                                                                                                                                                                                                                                                                                                                                                                                                                                                                                                                                                                                                                                                                                                                                                                                                                                                                                                                                                                                                                                                                                                                                                                                                                                                                                                                                                                                                                                                                                                                                                                                                                                                                                                                                                                                                                                                                                                                                                                            | Dr Ming Li    |
| <b>Abstract:</b>                                     | <p>The rhesus macaque (RM, <i>Macaca mulatta</i>) is the most important nonhuman primate model in evolutionary biology and biomedical research. We present the first population genomics survey of wild RMs, comprising 81 geo-referenced individuals representing five subspecies from 17 locations in China, covering a large fraction of the species' natural distribution. A total of 58.7 million of autosomal single nucleotide polymorphisms (SNPs) were detected. We find a hierarchical population structure with four distinct genetic lineages on the mainland and one on Hainan Island recapitulating current subspecies designations. The five subspecies are estimated to have diverged between 116 and 45 thousand years ago, but with recent gene flow among some groups. Consistent with the expectation of a larger body size in colder climates and a smaller body size in warmer climates (Bergman's rule), both the northernmost RM lineage (subspecies, <i>M. m. tcheliensis</i>), which exhibits the largest body size of all Chinese RMs, and the southernmost RM lineage (subspecies, <i>M. m. breviceaudus</i>), which exhibits the smallest body size of all Chinese RMs, are featured with positively selected genes responsible for skeletal development. In addition, two candidate selected genes (<i>Fbp1</i>, <i>Fbp2</i>) found in <i>M. m. tcheliensis</i> are involved in gluconeogenesis, which might play a key role to maintain a stable blood glucose levels during starvation when food resources are scarce in winter. The tropical subspecies <i>M. m. breviceaudus</i> is also characterized by positively selected genes related to cardiovascular function and response to temperature stimuli, which are potentially involved in adaptation to tropical climates. We further delineated 118 RM SNPs matching human disease-causing variants with 82 being subspecies-specific. The data presented herein provides a reference resource for the choice of RMs when carrying out biomedical experiments. The unexpected demographic history of Chinese RMs, coupled with their history of local adaptation offers new insights into the evolution of RMs and provides valuable baseline information for biomedical research.</p> |               |
| <b>Corresponding Author:</b>                         | Ming Li<br><br>CHINA                                                                                                                                                                                                                                                                                                                                                                                                                                                                                                                                                                                                                                                                                                                                                                                                                                                                                                                                                                                                                                                                                                                                                                                                                                                                                                                                                                                                                                                                                                                                                                                                                                                                                                                                                                                                                                                                                                                                                                                                                                                                                                                                                                                                                                                          |               |
| <b>Corresponding Author Secondary Information:</b>   |                                                                                                                                                                                                                                                                                                                                                                                                                                                                                                                                                                                                                                                                                                                                                                                                                                                                                                                                                                                                                                                                                                                                                                                                                                                                                                                                                                                                                                                                                                                                                                                                                                                                                                                                                                                                                                                                                                                                                                                                                                                                                                                                                                                                                                                                               |               |
| <b>Corresponding Author's Institution:</b>           |                                                                                                                                                                                                                                                                                                                                                                                                                                                                                                                                                                                                                                                                                                                                                                                                                                                                                                                                                                                                                                                                                                                                                                                                                                                                                                                                                                                                                                                                                                                                                                                                                                                                                                                                                                                                                                                                                                                                                                                                                                                                                                                                                                                                                                                                               |               |
| <b>Corresponding Author's Secondary Institution:</b> |                                                                                                                                                                                                                                                                                                                                                                                                                                                                                                                                                                                                                                                                                                                                                                                                                                                                                                                                                                                                                                                                                                                                                                                                                                                                                                                                                                                                                                                                                                                                                                                                                                                                                                                                                                                                                                                                                                                                                                                                                                                                                                                                                                                                                                                                               |               |
| <b>First Author:</b>                                 | Zhijin Liu                                                                                                                                                                                                                                                                                                                                                                                                                                                                                                                                                                                                                                                                                                                                                                                                                                                                                                                                                                                                                                                                                                                                                                                                                                                                                                                                                                                                                                                                                                                                                                                                                                                                                                                                                                                                                                                                                                                                                                                                                                                                                                                                                                                                                                                                    |               |
| <b>First Author Secondary Information:</b>           |                                                                                                                                                                                                                                                                                                                                                                                                                                                                                                                                                                                                                                                                                                                                                                                                                                                                                                                                                                                                                                                                                                                                                                                                                                                                                                                                                                                                                                                                                                                                                                                                                                                                                                                                                                                                                                                                                                                                                                                                                                                                                                                                                                                                                                                                               |               |
| <b>Order of Authors:</b>                             | Zhijin Liu                                                                                                                                                                                                                                                                                                                                                                                                                                                                                                                                                                                                                                                                                                                                                                                                                                                                                                                                                                                                                                                                                                                                                                                                                                                                                                                                                                                                                                                                                                                                                                                                                                                                                                                                                                                                                                                                                                                                                                                                                                                                                                                                                                                                                                                                    |               |

|                                                |                                                                                                                                                                                                                                                                                                                                                                                                                                                                                                                                                                                                                                                                                                                                                                                                                                                                                                                                                                                                                                                                                                                                                                                                                                                                                                                                                                                                                                                                                                                                                                                                                                                                                                                                                                                                                                                                                                                                                                                                                                                                                                                                                                                                                                                                                                                                                                                                                                                                                                                                                                             |
|------------------------------------------------|-----------------------------------------------------------------------------------------------------------------------------------------------------------------------------------------------------------------------------------------------------------------------------------------------------------------------------------------------------------------------------------------------------------------------------------------------------------------------------------------------------------------------------------------------------------------------------------------------------------------------------------------------------------------------------------------------------------------------------------------------------------------------------------------------------------------------------------------------------------------------------------------------------------------------------------------------------------------------------------------------------------------------------------------------------------------------------------------------------------------------------------------------------------------------------------------------------------------------------------------------------------------------------------------------------------------------------------------------------------------------------------------------------------------------------------------------------------------------------------------------------------------------------------------------------------------------------------------------------------------------------------------------------------------------------------------------------------------------------------------------------------------------------------------------------------------------------------------------------------------------------------------------------------------------------------------------------------------------------------------------------------------------------------------------------------------------------------------------------------------------------------------------------------------------------------------------------------------------------------------------------------------------------------------------------------------------------------------------------------------------------------------------------------------------------------------------------------------------------------------------------------------------------------------------------------------------------|
|                                                | Xinxin Tan                                                                                                                                                                                                                                                                                                                                                                                                                                                                                                                                                                                                                                                                                                                                                                                                                                                                                                                                                                                                                                                                                                                                                                                                                                                                                                                                                                                                                                                                                                                                                                                                                                                                                                                                                                                                                                                                                                                                                                                                                                                                                                                                                                                                                                                                                                                                                                                                                                                                                                                                                                  |
|                                                | Pablo Orozco-terWengel                                                                                                                                                                                                                                                                                                                                                                                                                                                                                                                                                                                                                                                                                                                                                                                                                                                                                                                                                                                                                                                                                                                                                                                                                                                                                                                                                                                                                                                                                                                                                                                                                                                                                                                                                                                                                                                                                                                                                                                                                                                                                                                                                                                                                                                                                                                                                                                                                                                                                                                                                      |
|                                                | Xuming Zhou                                                                                                                                                                                                                                                                                                                                                                                                                                                                                                                                                                                                                                                                                                                                                                                                                                                                                                                                                                                                                                                                                                                                                                                                                                                                                                                                                                                                                                                                                                                                                                                                                                                                                                                                                                                                                                                                                                                                                                                                                                                                                                                                                                                                                                                                                                                                                                                                                                                                                                                                                                 |
|                                                | Liye Zhang                                                                                                                                                                                                                                                                                                                                                                                                                                                                                                                                                                                                                                                                                                                                                                                                                                                                                                                                                                                                                                                                                                                                                                                                                                                                                                                                                                                                                                                                                                                                                                                                                                                                                                                                                                                                                                                                                                                                                                                                                                                                                                                                                                                                                                                                                                                                                                                                                                                                                                                                                                  |
|                                                | Shilin Tian                                                                                                                                                                                                                                                                                                                                                                                                                                                                                                                                                                                                                                                                                                                                                                                                                                                                                                                                                                                                                                                                                                                                                                                                                                                                                                                                                                                                                                                                                                                                                                                                                                                                                                                                                                                                                                                                                                                                                                                                                                                                                                                                                                                                                                                                                                                                                                                                                                                                                                                                                                 |
|                                                | Zhongze Yan                                                                                                                                                                                                                                                                                                                                                                                                                                                                                                                                                                                                                                                                                                                                                                                                                                                                                                                                                                                                                                                                                                                                                                                                                                                                                                                                                                                                                                                                                                                                                                                                                                                                                                                                                                                                                                                                                                                                                                                                                                                                                                                                                                                                                                                                                                                                                                                                                                                                                                                                                                 |
|                                                | Huailiang Xu                                                                                                                                                                                                                                                                                                                                                                                                                                                                                                                                                                                                                                                                                                                                                                                                                                                                                                                                                                                                                                                                                                                                                                                                                                                                                                                                                                                                                                                                                                                                                                                                                                                                                                                                                                                                                                                                                                                                                                                                                                                                                                                                                                                                                                                                                                                                                                                                                                                                                                                                                                |
|                                                | Baoping Ren                                                                                                                                                                                                                                                                                                                                                                                                                                                                                                                                                                                                                                                                                                                                                                                                                                                                                                                                                                                                                                                                                                                                                                                                                                                                                                                                                                                                                                                                                                                                                                                                                                                                                                                                                                                                                                                                                                                                                                                                                                                                                                                                                                                                                                                                                                                                                                                                                                                                                                                                                                 |
|                                                | Peng Zhang                                                                                                                                                                                                                                                                                                                                                                                                                                                                                                                                                                                                                                                                                                                                                                                                                                                                                                                                                                                                                                                                                                                                                                                                                                                                                                                                                                                                                                                                                                                                                                                                                                                                                                                                                                                                                                                                                                                                                                                                                                                                                                                                                                                                                                                                                                                                                                                                                                                                                                                                                                  |
|                                                | Zuofu Xiang                                                                                                                                                                                                                                                                                                                                                                                                                                                                                                                                                                                                                                                                                                                                                                                                                                                                                                                                                                                                                                                                                                                                                                                                                                                                                                                                                                                                                                                                                                                                                                                                                                                                                                                                                                                                                                                                                                                                                                                                                                                                                                                                                                                                                                                                                                                                                                                                                                                                                                                                                                 |
|                                                | Binghua Sun                                                                                                                                                                                                                                                                                                                                                                                                                                                                                                                                                                                                                                                                                                                                                                                                                                                                                                                                                                                                                                                                                                                                                                                                                                                                                                                                                                                                                                                                                                                                                                                                                                                                                                                                                                                                                                                                                                                                                                                                                                                                                                                                                                                                                                                                                                                                                                                                                                                                                                                                                                 |
|                                                | Christian Roos                                                                                                                                                                                                                                                                                                                                                                                                                                                                                                                                                                                                                                                                                                                                                                                                                                                                                                                                                                                                                                                                                                                                                                                                                                                                                                                                                                                                                                                                                                                                                                                                                                                                                                                                                                                                                                                                                                                                                                                                                                                                                                                                                                                                                                                                                                                                                                                                                                                                                                                                                              |
|                                                | Michael W. Bruford                                                                                                                                                                                                                                                                                                                                                                                                                                                                                                                                                                                                                                                                                                                                                                                                                                                                                                                                                                                                                                                                                                                                                                                                                                                                                                                                                                                                                                                                                                                                                                                                                                                                                                                                                                                                                                                                                                                                                                                                                                                                                                                                                                                                                                                                                                                                                                                                                                                                                                                                                          |
|                                                | Ming Li                                                                                                                                                                                                                                                                                                                                                                                                                                                                                                                                                                                                                                                                                                                                                                                                                                                                                                                                                                                                                                                                                                                                                                                                                                                                                                                                                                                                                                                                                                                                                                                                                                                                                                                                                                                                                                                                                                                                                                                                                                                                                                                                                                                                                                                                                                                                                                                                                                                                                                                                                                     |
| <b>Order of Authors Secondary Information:</b> |                                                                                                                                                                                                                                                                                                                                                                                                                                                                                                                                                                                                                                                                                                                                                                                                                                                                                                                                                                                                                                                                                                                                                                                                                                                                                                                                                                                                                                                                                                                                                                                                                                                                                                                                                                                                                                                                                                                                                                                                                                                                                                                                                                                                                                                                                                                                                                                                                                                                                                                                                                             |
| <b>Response to Reviewers:</b>                  | <p>Dear Dr. Hans Zauner,</p> <p>Thank you for your consideration and encouragement of our submission to GigaScience. In light of the reviewers' constructive comments, we have revised the manuscript and would like to re-submit it to GigaScience. Generally, we have re-done the analyses based on the updated genome reference of rhesus macaque (Mmul_8.0.1) and re-designed the models for demographic model testing. The point-by-point response to the comments are below:</p> <p>Reviewer #1:</p> <p>Comment 1-1:</p> <p>The rhemac2 reference genome assembly is an old genome reference sequence. There are now more recent, higher quality reference assemblies for this species. However, I do not think that the use of rhemac2 is necessarily a major problem for the population phylogenetics and demographic analyses. SNPs identified using rhemac2 should be very similar (though not identical) to the SNP calls that would be obtained using the more recent assemblies. And it should not be a problem that the rhemac2 assembly is built from an Indian-origin animal. It would have been better (more comprehensive and less susceptible to errors) for the authors to use a more recent reference genome, but using rhemac2 for the evolutionary and demographic analyses does not seem to me to be a major concern.</p> <p>Response 1-1:</p> <p>We really appreciated this suggestion. We have performed SNP calling using the new genome reference of rhesus macaque Mmul_8.0.1 (line 101 and 378). The population structure, phylogenetic and demographic analyses were also carried out with the new dataset. As predicted by the reviewer, the new results are very similar to the former results using rheMac2 (Figure 1, Supplementary Fig. 4 and 5, Supplementary Table 4).</p> <p>Comment 1-2:</p> <p>The second aspect of the paper is an analysis of functional genetic variation. The authors used FST and other population statistics to identify regions of the macaque genome that show significant differentiation among populations, focusing particularly on the most northern and most southern populations. These analyses suggest that there has been selection for differences in skeletal development and cardiovascular physiology that distinguish Chinese rhesus subspecies (selective sweeps). I do have some concerns about these analyses.</p> <p>a) First and most importantly, this is where the use of rhemac2 as the reference assembly seems to me to be somewhat problematic. The rhemac2 assembly contains</p> |

some assembly errors. But more relevant to this manuscript, it was annotated by NCBI and Ensembl before there was substantial RNA sequence data to assist in gene prediction. Investigators who have used rhemac2 for functional studies of protein-coding genes have found errors in some of the gene models, likely due to the lack of access to good RNA sequence data at the time of the annotation. The newer reference genomes for rhesus macaque (e.g. Mmul\_8.0.1) have also been annotated by NCBI and Ensembl. These newer annotations are more complete and more accurate because there is now more RNA sequence data available to support gene models and to identify true exon-intron boundaries. I would be concerned that some of the conclusions Liu et al. have generated regarding selection on specific genes may be problematic due to potential problems with rhemac2 gene annotations. Even though the analyses depend on FST and related statistics 9 (and not dN/dS ratios), I assume that the authors did examine the coding sequence differences among Chinese rhesus populations for the genes that they infer were under selection. I recommend that the authors (at a minimum) re-check their analyses and conclusions regarding positive selection on specific genes, using the more accurate, better annotated reference assemblies that were produced more recently than rhemac2.

Response 1-2:

In this revised manuscript, all analyses were carried out based on the genome reference and the annotation of Mmul\_8.0.1. Most of the previously observed selection signals were confirmed, but also new findings were obtained.

Among the 176 genes found to be under positive selection in *M. m. tcheliensis*, two (Fbp1, Fbp2, modified Fisher Exact  $P=1.90E-02$ ; Fig. 3c, d; Supplementary Table 7) are enriched in the gene ontology (GO) term “fructose 1, 6-bisphosphate 1-phosphatase activity”. These two genes encode for fructose-1, 6-bisphosphatase 1 and fructose-1, 6-bisphosphatase isozyme 2 which catalyze the hydrolysis of fructose 1, 6-bisphosphate and play a rate-limiting role in gluconeogenesis. Furthermore, in starved zebrafish it was shown that the expression of Fbp1 was significantly unregulated in brain and liver tissues. Our findings suggest that the regulation of gluconeogenesis might be a mechanism of *M. m. tcheliensis* to adapt to food shortage in winter. (line 222-236)

Additionally, we have found 127 putatively selected genes in *M. m. breviceaudus*, four of which were enriched in GO term “Bone morphogenetic protein (BMP) signaling pathway” (modified Fisher Exact  $P=4.65E-02$ ) and two genes were enriched in GO term “I-SMAD binding ( $P=4.65E-02$ )”. These genes under selection might have contributed to smaller body size of *M. m. breviceaudus* and adaptation to hot climate. (line 257-265)

Comment 1-3:

b) It is not clear from this version of the manuscript (lines 207-219) whether Liu et al. observed any non-synonymous variants in the genes they identified as showing evidence of selective sweeps. Were there non-synonymous differences in the alleles found in the different Chinese rhesus populations, or were all the FST values based on intronic and/or intervening SNPs between genes? The case for positive selection on PAPSS2, SOX5 and other genes would be stronger if the authors identified non-synonymous or other coding variants that are predicted to influence protein function. If there are no non-synonymous differences observed between populations, then Liu et al. would (I suppose) have to argue that the selection was on non-coding regulatory variants. No specific statement about how the proposed selection is suggested to have influenced these genes is presented in the manuscript. Readers should be informed as to what particular variants distinguish the alleles in *M. m. tcheliensis* from *M. m. breviceaudus*, etc., and why the authors believe the observed sequence differences constitute true functional differences.

Response 1-3:

This is a very good point. Both coding and non-coding changes could contribute to local adaptations of organisms. To further investigate the adaptive mechanism of *M. m. tcheliensis* and *M. m. breviceaudus* to the opposite climates (cold versus hot), we focused on SNPs in the gene regions of above described candidate genes. A total of 5817 SNPs were found with significant differences at the 5% level in the distributions of genotypes between these two subspecies, and 10 SNPs were non-synonymous variants (Supplementary table 10 and 11). In *M. m. tcheliensis*, non-synonymous mutations were found in the coding regions of Atp6v0a4 (R667Q), Ext2 (I363M), Fto (N10S) and Rpgr11 (R1281Q) (Supplementary table 11 and Supplementary Fig. 13), implying that selection might have acted on protein sequence changes. No non-

synonymous changes were detected in Fbp1, Fbp2, Sox5 and Sox6. However, SNPs are located in the 1kb up/downstream, 5' and 3' UTR, and intronic regions of these genes (Supplementary table 10), indicating selection on non-coding regulatory variants. Correspondingly, non-synonymous mutations in Aggf1 (H343Y), Axin1 (A674G, T656I), Hspa4 (I782V) and Cttna3 (V551I, T577M) were revealed for *M. m. brevicaudus* (Supplementary table 11 and Supplementary Fig. 13) (line 278-291).

Comment 1-4:

c) It is not stated (lines 220-232) whether the GO terms related to heart development, heart rate or temperature response are statistically significantly enriched in this analysis. The authors should provide the same type of statistical evidence for these GO term results that they do for the limb morphogenesis results above.

Response 1-4:

We have found three putatively selected genes related to GO terms of "blood vessel morphogenesis", "regulation of heart rate by cardiac conduction" and "response to temperature stimulus". However, these GO terms are not significantly enriched (line 266-271).

Comment 1-5:

The new results presented in this paper regarding phylogenetic relationships among populations, and the history of population differentiation and effective size change, are important findings and make a valuable contribution to the literature.

Response 1-5:

Thank you for such an evaluation.

Other minor issues:

Comment 1-6:

Line 79: I think there may be a typo here. I do not think the authors intend to state that the effective population size of Indian rhesus macaques is only 17,000. This should be checked again.

Response 1-6:

It is not a typo here. The study on demographic history of Chinese and Indian RMs by Hernandez et al. (2007) revealed effective population sizes of ~ 17,014 and 239,704 for Indian and Chinese populations, respectively.

Comment 1-7:

Lines 137-148: It might be useful to compare the results for population size change over time that Liu et al. obtain here to those of previous population genetic analyses of rhesus macaques (e.g. Xue et al. 2016 and Hernandez et al. 2007).

Response 1-7:

We really appreciated this suggestion. Interestingly, the demographic inference by Xue et al. 2016 of the genomic data for one Chinese RM (CH\_37945) from AH (*M. m. littoralis*) qualitatively resembled the demographic trajectory of *M. m. littoralis* herein presented (line 156-158).

Hernandez et al. reported that Chinese RM population has experienced 3.3-fold growth. We have checked the sample information of nine Chinese RMs included in Hernandez et al. 2007. Seven of the Chinese animals were sampled from Suzhou (eastern China), one from Kunming (western China), and one from Guangdong (eastern China), which means eight individuals of *M. m. littoralis* and one of *M. m. mulatta*. Coincidentally, a population expansion of *M. m. littoralis* (from  $NA1 = 2.0k$  to  $Nli = 24.6k$ ; Supplementary Table 5) since 44.8 kya was also detected in our results (line 175-178). However, since the RMs studied in Hernandez et al. 2007 were captive-born, although with wild-caught parents, different populations have been mixed. Wild-caught RMs are often transferred from one breeding center to another. Thus we think a comparison between captive- and wild-born RMs perhaps is inappropriate. So we do not address this point in the manuscript.

Comment 1-8:

Lines 145-148: How do the authors reconcile the different estimates for effective population size at about 60-80,000 years ago for *M. m. tcheliensis*, *M. m. littoralis* and *M. m. brevicaudus* that were obtained by the PSMC analysis versus the fastsimcoal2 analysis? Do the authors favor one of these over the other? Is there possibly a way to reconcile these different results?

Response 1-8:

The fastsimcoal2 analysis revealed a bottleneck in population size (NA1 =2.0k and NA2 =1.5k) of pan-eastern RMs (*M. m. tcheliensis*, *M. m. littoralis* and *M. m. breviceaudus*) during the period from 111.9 kya to 45.0 kya (Fig. 2b), which coincided with the population decline of pan-eastern RMs since approximately 100 kya as revealed by PSMC analyses. However, the population growth that occurred in pan-eastern RMs after the bottleneck has not been detected by PSMC analyses, given that PSMC is less accurate when reconstructing recent histories within ~100 kya (line 175-180). We prefer the PSMC analysis to reconstruct the historical demography older than 100 kya, and prefer fastsimcoal2 to model more recent demographic fluctuations.

Reviewer #2:

Comment 2-1:

In the first part, the authors reconstruct the phylogeny of Chinese rhesus macaques based on a whole-genome neighbor-joining tree. This is a rather crude type of phylogenomic analysis and doesn't allow to draw conclusions about the evolutionary history as done on lines 109-114. Here, the paper would benefit a lot from applying proper species tree methods that take incomplete lineage sorting into account. This will provide a reliable picture about the phylogenetic relationships of the five subspecies that can then act as a useful starting point to design a set of demographic models to test in the next step.

Response 2-1:

Many thanks for this helpful comment. To reveal the phylogenetic relationships among the five Chinese RM subspecies, we now employed the SVDquartets approach that takes incomplete lineage sorting into account (line 159-160, 412-414). The obtained phylogenetic tree suggests a “step-by-step” divergence for five Chinese RM subspecies. Accordingly, the *M. m. mulatta* lineage diverged from that of the remaining Chinese RMs firstly and then the *M. m. lasiotis* diverged from the ancestral lineage of pan-eastern RMs (*M. m. tcheliensis*, *M. m. littoralis* and *M. m. breviceaudus*). Subsequently, *M. m. breviceaudus* diverged from the ancestor of *M. m. tcheliensis* and *M. m. littoralis*, the divergence of which occurred lastly (Supplementary Fig. 6) (line 161-166). We used this pattern as starting point to design testable demographic models (see below).

Comment 2-2:

My main concern deals with the design of the models for demographic model testing. Here, the paper lacks critical details to understand the reasoning behind the selection of the 8 compared models. It's completely unclear how these models have been chosen from the total number of possible (sub)species tree configurations and how they were parameterized. Supplementary Table 5 shows that the number of parameters in these 8 models range from 6 to 12, but they seem to do so in a very unintuitive way. For example, in Supplementary Figure 6 it seems that model 2 is a simplified version of model 8 with one less divergence time parameter. But Supplementary Table 5 shows that model 2 has actually 3 parameters more than model 8. Moreover, for parameter estimation, the authors expanded the selected model 2 by additional parameters without specifying which of the parameters listed in Supplementary Table 6 have already been part of the model selection. Comparing oversimplified models might lead to the selection of a suboptimal model in the first step. It's therefore absolutely crucial that the authors provide a detailed table showing the parameterization of all tested models (including parameter bounds) and explain in detail the reasoning behind the selection and design of these models. The type and parameterization of models has a strong impact on the outcome of such model testing approaches and without this critical information, it's impossible to assess how robust the findings of this analysis actually are. Additionally, the authors should provide a measure of the goodness of fit of the selected scenario to show that this model can reasonably well explain the observed data.

Response 2-2:

The SVDquartets approach (see above) revealed only one divergence scenario. Under this “step-by-step” divergence scenario, we performed the joint site frequency spectrum (SFS) approach implemented in fastsimcoal2 to model demographic fluctuations, respective divergence times and gene flow events among the five RM subspecies. In Supplementary Table 5 the full results are provided. (line 159-181)

Comment 2-3:

In the positive selection analysis, the authors calculate genetic diversity ( $\theta$  or  $\pi$ ) based on their set of variable sites only. This approach is flawed, as it doesn't allow to distinguish between non-variable sites and sites that are not sufficiently covered for reliable genotyping in the sequenced individuals. It is therefore important that the authors take coverage information for every site in the genome into account in order to obtain reliable estimates of window-wise genetic diversity.

Response 2-3:

In the revised manuscript, we performed SNP calling again following GATK's best practice based on the single-sample calling plus joint genotyping workflow. For a variant which is not callable because of low coverage when processed separately, Joint calling allows evidence to be accumulated over all samples and renders the variant callable. In our re-analysis, we detected 58.7 million autosomal SNPs, while before only 55.4 million SNPs were found. The additionally called SNPs are due to the refined protocol and better genome reference. (line 378-387)

Minor issues:

Comment 2-4:

Lines 31-33: Genetic diversity is measured over all sites, not just the SNPs (see above).

Response 2-4:

It has been amended accordingly. We just say "A total of 58.7 million autosomal single nucleotide polymorphisms (SNPs) were detected". (line 32-33)

Comment 2-5:

Line 51: Not clear what 'successful' is supposed to mean here.

Response 2-5:

Judged by population size and geographic distribution, RMs are, after humans, the world's most successful primate, occupying a vast geographic distribution. Here we replaced "successful" with "most widely distributed" (line 55-56).

Comment 2-6:

Line 82: "including phylogenetic and demographic analyses, as well as genome-wide selection scans, ..."

Response 2-6:

It has been amended accordingly. (line 87-90)

Comment 2-7:

Lines 97-98: The number of SNPs is not informative here, since it depends on the number of individuals. Use suitable measures of genetic diversity, such as Watterson's  $\theta$  or  $\pi$ .

Response 2-7:

It has been amended accordingly. The value of Watterson's  $\theta$  ( $S$ ) and genetic diversity ( $\pi$ ) is 0.00342 and 0.00228, respectively (Table 1). (line 102-104)

Comment 2-8:

Lines 98-99: Not clear if the number of SNPs per individual refers to all positions with differences to the reference or only the heterozygous positions within individuals.

Response 2-8:

It refers to all positions with differences to the genome reference. (line 104-106)

Comment 2-9:

Lines 99-103: Use consistent style for point estimates and CI in the brackets, i.e. proportions instead of percentages.

Response 2-9:

It has been amended accordingly.

Comment 2-10:

Lines 103-105: Are these numbers only referring to shared segregating variation or also including fixed differences to the reference?

Response 2-10:

Including fixed differences to the genome reference. (line 106-108)

Comment 2-11:



Line 116: "admixture proportions"  
Response 2-11:  
It has been amended accordingly (line 120).

Comment 2-12:  
Lines 149-150: "we further employed a joint site frequency spectrum (SFS) based approach to model"  
Response 2-12:  
It has been amended accordingly (line 167).

Comment 2-13:  
Lines 152-153: Unclear what is meant by "produced a significantly better fit of a step by step divergence scenario than alternative ones, ..."  
Response 2-13:  
This part has been re-written and this sentence has been removed.

Comment 2-14:  
Line 167: Start a new sentence after "an eastern clade"  
Response 2-14:  
It has been amended accordingly (line 184).

Comment 2-15:  
Lines 233-234: "we also found signatures of positive selection in genes related to ..."  
Response 2-15:  
It has been amended accordingly. (line 292-293)

Comment 2-16:  
Lines 234-235: The 104 candidate genes are enriched for a certain GO term, rather than the three genes being enriched in a certain GO term.  
Response 2-16:  
It has been amended accordingly (line 293-296).

Comment 2-17:  
Lines 323-324: Provide more details about the variant calling here. Just providing the reference is not sufficient for the reader to get a quick overview of the applied methods.  
Response 2-17:  
It has been amended accordingly. We performed SNP calling following GATK's best practice and the more details about the variant calling protocol was described in line 378-388.

Comment 2-18:  
Line 334: "branch support" instead of "branch reliability"  
Response 2-18:  
It has been amended accordingly (line 393).

Comment 2-19:  
Line 343: "Decay of linkage disequilibrium against physical distance"  
Response 2-19:  
It has been amended accordingly (line 402-404).

Comment 2-20:  
Line 349: Provide more details about the reasoning behind choosing the stated values for generation time and mutation rate.  
Response 2-20:  
For all demographic estimations, we have chosen a mutation rate of  $1 \times 10^{-8}$  per site per generation and a generation time of 11 yr, which were used in the previous population genomic analyses of 133 rhesus macaques (Xue et al. 2017). To compare our results and Xue's results, we took the same values of mutation rate and generation time. Xue et al. explained the rationale behind these values: "The most appropriate mutation rate to use for this type of analysis remains somewhat controversial, in which a variety of methods have been used to determine the "best" estimate (Ségurel et al. 2014). For rhesus macaques, there is far less empirical evidence. We chose a mutation rate of  $1.0 \times 10^{-8}$  per site per generation for macaques, because a review of

|                                                                                                                                                                                                                                                                                                                                                                                                                                    |                                                                                                                                                                                                                                                                                                                                                                                                                                                                                                                                                                                                                                                                                                                                                                                                                                                                                                                                                                                                                                                                                                                                                                                                                                                                                                                                                                                                                                                                                                                                                                                                                                                                                                                                                                                                                                            |
|------------------------------------------------------------------------------------------------------------------------------------------------------------------------------------------------------------------------------------------------------------------------------------------------------------------------------------------------------------------------------------------------------------------------------------|--------------------------------------------------------------------------------------------------------------------------------------------------------------------------------------------------------------------------------------------------------------------------------------------------------------------------------------------------------------------------------------------------------------------------------------------------------------------------------------------------------------------------------------------------------------------------------------------------------------------------------------------------------------------------------------------------------------------------------------------------------------------------------------------------------------------------------------------------------------------------------------------------------------------------------------------------------------------------------------------------------------------------------------------------------------------------------------------------------------------------------------------------------------------------------------------------------------------------------------------------------------------------------------------------------------------------------------------------------------------------------------------------------------------------------------------------------------------------------------------------------------------------------------------------------------------------------------------------------------------------------------------------------------------------------------------------------------------------------------------------------------------------------------------------------------------------------------------|
|                                                                                                                                                                                                                                                                                                                                                                                                                                    | <p>the data for humans suggests a rate of <math>1.0\text{--}1.5\times 10^{-8}</math> per site per generation (Ségurel et al. 2014). Assuming the generation time for rhesus macaques is 11 yr and humans is 25 yr, the per year mutation rates are then <math>0.9\times 10^{-9}</math> for macaques and <math>0.4\text{--}0.6\times 10^{-9}</math> for humans, an appropriate ratio given the demonstrated slowdown in humans and other hominoids. Generation time is set at 11 yr based on the field data that indicate rhesus macaques begin reproduction ~6 yr of age and can breed until their late teens, resulting in age at median birth of ~11 yr." However, perhaps it is not appropriate to paste this explanation into our manuscript. Thus I said "for the rationale to use these values see [6, 73] (Ségurel et al. 2014; Xue et al. 2017)". (line 409-410)</p> <p>Comment 2-21:<br/>Line 353: "to model" rather than "to simulate"</p> <p>Response 2-21:<br/>It has been amended accordingly (line 415).</p> <p>Comment 2-22:<br/>Line 356: "to identify the one that is best supported by the observed data"</p> <p>Response 2-22:<br/>This part has been re-written and this sentence has been removed.</p> <p>Comment 2-23:<br/>Line 359: How many replicates?</p> <p>Response 2-23:<br/>Each model was tested for 200 replicates (line 420).</p> <p>Comment 2-24:<br/>Line 364: Which additional parameters? See comment above.</p> <p>Response 2-24:<br/>This part has been re-written and this sentence has been removed.</p> <p>Comment 2-25:<br/>Line 371-373: Rewrite this sentence.</p> <p>Response 2-25:<br/>It has been amended accordingly. (429-430)</p> <p>Comment 2-26:<br/>Line 379: "candidate regions under positive selection"</p> <p>Response 2-26:<br/>It has been amended accordingly (line 436).</p> |
| <b>Additional Information:</b>                                                                                                                                                                                                                                                                                                                                                                                                     |                                                                                                                                                                                                                                                                                                                                                                                                                                                                                                                                                                                                                                                                                                                                                                                                                                                                                                                                                                                                                                                                                                                                                                                                                                                                                                                                                                                                                                                                                                                                                                                                                                                                                                                                                                                                                                            |
| <b>Question</b>                                                                                                                                                                                                                                                                                                                                                                                                                    | <b>Response</b>                                                                                                                                                                                                                                                                                                                                                                                                                                                                                                                                                                                                                                                                                                                                                                                                                                                                                                                                                                                                                                                                                                                                                                                                                                                                                                                                                                                                                                                                                                                                                                                                                                                                                                                                                                                                                            |
| Are you submitting this manuscript to a special series or article collection?                                                                                                                                                                                                                                                                                                                                                      | No                                                                                                                                                                                                                                                                                                                                                                                                                                                                                                                                                                                                                                                                                                                                                                                                                                                                                                                                                                                                                                                                                                                                                                                                                                                                                                                                                                                                                                                                                                                                                                                                                                                                                                                                                                                                                                         |
| <p><b>Experimental design and statistics</b></p> <p>Full details of the experimental design and statistical methods used should be given in the Methods section, as detailed in our <a href="#">Minimum Standards Reporting Checklist</a>. Information essential to interpreting the data presented should be made available in the figure legends.</p> <p>Have you included all the information requested in your manuscript?</p> | Yes                                                                                                                                                                                                                                                                                                                                                                                                                                                                                                                                                                                                                                                                                                                                                                                                                                                                                                                                                                                                                                                                                                                                                                                                                                                                                                                                                                                                                                                                                                                                                                                                                                                                                                                                                                                                                                        |
| <b>Resources</b>                                                                                                                                                                                                                                                                                                                                                                                                                   | Yes                                                                                                                                                                                                                                                                                                                                                                                                                                                                                                                                                                                                                                                                                                                                                                                                                                                                                                                                                                                                                                                                                                                                                                                                                                                                                                                                                                                                                                                                                                                                                                                                                                                                                                                                                                                                                                        |



|                                                                                                                                                                                                                                                                                                                                                                                                                                                                                                                                                         |            |
|---------------------------------------------------------------------------------------------------------------------------------------------------------------------------------------------------------------------------------------------------------------------------------------------------------------------------------------------------------------------------------------------------------------------------------------------------------------------------------------------------------------------------------------------------------|------------|
| <p>A description of all resources used, including antibodies, cell lines, animals and software tools, with enough information to allow them to be uniquely identified, should be included in the Methods section. Authors are strongly encouraged to cite <a href="#">Research Resource Identifiers</a> (RRIDs) for antibodies, model organisms and tools, where possible.</p> <p>Have you included the information requested as detailed in our <a href="#">Minimum Standards Reporting Checklist</a>?</p>                                             |            |
| <p><b>Availability of data and materials</b></p> <p>All datasets and code on which the conclusions of the paper rely must be either included in your submission or deposited in <a href="#">publicly available repositories</a> (where available and ethically appropriate), referencing such data using a unique identifier in the references and in the “Availability of Data and Materials” section of your manuscript.</p> <p>Have you have met the above requirement as detailed in our <a href="#">Minimum Standards Reporting Checklist</a>?</p> | <p>Yes</p> |

1 **Title:** Population genomics of wild Chinese rhesus macaques reveals a  
2 dynamic demographic history and local adaptation, with implications for  
3 biomedical research

4 **Running Title:** Population genomics of wild rhesus macaques

5 Zhijin Liu<sup>1, †</sup>, Xinxin Tan<sup>1, 2, †</sup>, Pablo Orozco-terWengel<sup>3, †</sup>, Xuming Zhou<sup>4</sup>, Liye Zhang<sup>1, 2</sup>, Shilin  
6 Tian<sup>5</sup>, Zhongze Yan<sup>1, 6</sup>, Huailiang Xu<sup>7</sup>, Baoping Ren<sup>1</sup>, Peng Zhang<sup>8</sup>, Zuofu Xiang<sup>9</sup>, Binghua  
7 Sun<sup>10</sup>, Christian Roos<sup>11</sup>, Michael W. Bruford<sup>3, \*</sup>, Ming Li<sup>1, 12 \*</sup>

8 <sup>1</sup> Key Laboratory of Animal Ecology and Conservation Biology, Institute of Zoology, Chinese  
9 Academy of Sciences, Beijing, China.

10 <sup>2</sup> University of Chinese Academy of Sciences, Beijing 100039, China.

11 <sup>3</sup> School of Biosciences, Cardiff University, Sir Martin Evans Building, Museum Avenue, Cardiff  
12 CF10 3AX, United Kingdom.

13 <sup>4</sup> Division of Genetics, Department of Medicine, Brigham and Women's Hospital, Harvard  
14 Medical School, Boston, MA 02115, USA.

15 <sup>5</sup> Novogene Bioinformatics Institute, Beijing 100083, China.

16 <sup>6</sup> Institute of Health Sciences, Anhui University, Hefei, 230601, China.

17 <sup>7</sup> College of Life Science, Sichuan Agricultural University, Ya'an 625014, China.

18 <sup>8</sup> School of Sociology and Anthropology, Sun Yat-sen University, Guang Zhou, China.

19 <sup>9</sup> College of Life Science and Technology, Central South University of Forestry and Technology,  
20 Changsha 410004, Hunan, China.

21 <sup>10</sup> School of Life Sciences, Anhui University, Hefei, 230601, China.

22 <sup>11</sup> Gene Bank of Primates and Primate Genetics Laboratory, German Primate Center, Leibniz  
23 Institute for Primate Research, Kellnerweg 4, 37077 Göttingen, Germany.

24 <sup>12</sup> Center for Excellence in Animal Evolution and Genetics, Chinese Academy of Sciences,  
25 Kunming, 650223, China.

26 † Contributed equally

27 \* Correspondence: Ming Li, [lim@ioz.ac.cn](mailto:lim@ioz.ac.cn); Michael W. Bruford, [BrufordMW@cardiff.ac.uk](mailto:BrufordMW@cardiff.ac.uk)

## Abstract

The rhesus macaque (RM, *Macaca mulatta*) is the most important nonhuman primate model in evolutionary biology and biomedical research. We present the first population genomics survey of wild RMs, comprising 81 geo-referenced individuals representing five subspecies from 17 locations in China, covering a large fraction of the species' natural distribution. A total of 58.7 million of autosomal single nucleotide polymorphisms (SNPs) were detected. We find a hierarchical population structure with four distinct genetic lineages on the mainland and one on Hainan Island recapitulating current subspecies designations. The five subspecies are estimated to have diverged between 116 and 45 thousand years ago, but with recent gene flow among some groups. Consistent with the expectation of a larger body size in colder climates and a smaller body size in warmer climates (Bergman's rule), both the northernmost RM lineage (subspecies, *M. m. tcheliensis*), which exhibits the largest body size of all Chinese RMs, and the southernmost RM lineage (subspecies, *M. m. breviceaudus*), which exhibits the smallest body size of all Chinese RMs, are featured with positively selected genes responsible for skeletal development. In addition, two candidate selected genes (*Fbp1*, *Fbp2*) found in *M. m. tcheliensis* are involved in gluconeogenesis, which might play a key role to maintain a stable blood glucose levels during starvation when food resources are scarce in winter. The tropical subspecies *M. m. breviceaudus* is also characterized by positively selected genes related to cardiovascular function and response to temperature stimuli, which are potentially involved in adaptation to tropical climates. We further delineated 118 RM SNPs matching human disease-causing variants with 82 being subspecies-specific. The data presented herein provides a reference resource for the choice of RMs when carrying out biomedical experiments. The unexpected demographic history of Chinese RMs, coupled with their history of local adaption offers new insights into the evolution of RMs and provides valuable baseline information for biomedical research.

**Keywords:** *Macaca mulatta*, population genomics, adaptive selection, biomedical model

## 53 Introduction

54 Understanding how species evolve and adapt to their environments is an essential question in  
55 evolutionary biology. Rhesus macaques (RMs, *Macaca mulatta*) are, after humans, the world's  
56 most widely distributed primates [1-5], occupying a vast geographic distribution spanning from  
57 Afghanistan to the Chinese shore of the Pacific Ocean and south into Myanmar, Thailand, Laos  
58 and Vietnam [5]. As the most widely distributed nonhuman primate species, RMs occupy diverse  
59 ecological landscapes and habitats, making them an interesting model to address questions about  
60 how species evolve and adapt to local environmental variation, including characterizing the  
61 genomic architecture of adaptation to habitat, climate and other biotic and abiotic factors. Yet,  
62 despite much work on primate comparative genomics, very few population genomic studies have  
63 been carried out on wild RMs [6, 7]. Importantly, as RMs are widely used as a primate model in  
64 physiological, psychological and cognitive studies [8-10], knowledge about their genomic  
65 architecture could improve and refine biomedical research [10] as the genomic composition of  
66 experimental animals can have a considerable influence on the outcome of experiments [11, 12].  
67 Therefore, information on the genomic diversity not only of captive, but also of wild RMs, that  
68 could become a genomic resource for future utilization in medical research, is essential.

69 In biomedical research, two main RM populations (Indian and Chinese) are recognized [6,  
70 13]. They diverged from each other ~162 thousand years ago (kya) and are characterized by  
71 extensive differences in morphology, behavior, ecology, physiology, reproduction, and disease  
72 progression [6, 13-19]. In 1978 India banned all RM exports to breeding centers across the world,  
73 thus curtailing the availability of wild Indian RMs and subsequently increasing the demand for  
74 Chinese RMs in biomedical research, thereby making a detailed characterization of genetic  
75 variants from Chinese RMs crucial for biomedical usage of this species.

76 To date, the genomes of 133 captive RMs from eight colonies have been sequenced,  
77 however, 124 of them are of Indian-origin and only nine individuals were presumed to be of  
78 Chinese origin [6]. Recently, Zhong *et al.* [7] reported genomic variation in 26 Chinese captive  
79 RMs identifying ~46 million (M) single nucleotide polymorphisms (SNPs). Nevertheless, most  
80 of the RM genetic variation known to date is limited to captive populations which may contain  
81 composite genotypes due of admixture among animals of different and unclear origin [20]. Here

1 82 we present the first attempt to survey the geo-referenced genomic diversity in wild Chinese RM  
2 83 populations, which is the largest extant population of the species. The current effective  
3 84 population size of Chinese and Indian RM was estimated to be approximate 240,000 and 17,000  
4 85 individuals, respectively, indicating that the Chinese RMs are likely to harbor substantially more  
5 86 genomic diversity compared to their Indian conspecifics [13]. Therefore, this population  
6 87 genomic survey of 81 RMs originating from 17 wild locations across China including  
7 88 phylogenetic and demographic analyses, as well as genome-wide selection scans, corresponds to  
8 89 the most comprehensive characterization of RM genetic diversity to date and aimed at  
9 90 characterizing the processes leading to the extant patterns of variability, as well as identifying the  
10 91 potential implications for the use of these populations in biomedical research.  
11  
12  
13  
14  
15  
16  
17  
18  
19  
20  
21  
22

## 23 93 **Results and Discussion**

### 24 94 **Genetic diversity, phylogeny and population structure**

25 95 Blood and tissue samples from 79 wild-born RMs, representing five subspecies [21, 22], were  
26 96 collected at 17 sites in China (*M. m. tcheliensis*: TH; *M. m. littoralis*: AH, FJ, HB, GX, GZ; *M. m.*  
27 97 *brevicaudus*: HN; *M. m. lasiotis*: SX, SC1, SC2, SC3, SC4; *M. m. mulatta*: YN1, YN2, YN3, YN4,  
28 98 YN5; Fig. 1a). Genome sequences of two additional Chinese RMs (CR1 and CR2) were retrieved  
29 99 from NCBI [9, 23, 24]. Re-sequencing was at a high average depth of  $27.79 \pm 5.31 \times$  for ten  
30 100 individuals and a moderate average depth of  $9.99 \pm 1.05 \times$  for the remainder (n=71), with an overall  
31 101 average genome coverage of 93.77% of the RM reference (Mmul\_8.0.1, Supplementary Table 1).  
32 102 A total of 58,682,158 autosome SNPs were identified in these 81 wild Chinese RMs  
33 103 (Supplementary Table 2), and the genetic diversity measured by segregating sites (Watterson's  $\theta$ ,  
34 104 S) and observed genetic diversity ( $\pi$ ) is 0.00342 and 0.00228, respectively (Table 1). The number  
35 105 of SNPs (all positions with differences to the genome reference) per individual ranged from 6.4 to  
36 106 9.8 M (mean of 8.54 M; Supplementary Fig. 1 and Supplementary Table 3). Among all detected  
37 107 SNPs, 7,270,577 were shared among all subspecies and 25,951,399 were shared by at least two  
38 108 subspecies, with the remaining SNPs confined to a single subspecies (Supplementary Fig. 2a). For  
39 109 each subspecies, the subspecies-specific SNPs (ssSNPs) ranged from 870,488 to 9,230,057 and the  
40 110 non-synonymous ssSNPs varied from 4,788 to 34,174 (Supplementary Fig. 2a, b). Among  
41  
42  
43  
44  
45  
46  
47  
48  
49  
50  
51  
52  
53  
54  
55  
56  
57  
58  
59  
60  
61  
62  
63  
64  
65

111 Chinese RM subspecies, *M. m. mulatta* had the highest heterozygosity ( $2.08 \times 10^{-3} \pm 4.42 \times 10^{-5}$ ),  
112 followed by *M. m. lasiotis* ( $1.82 \times 10^{-3} \pm 1.58 \times 10^{-4}$ ) and *M. m. littoralis* ( $1.78 \times 10^{-3} \pm 1.37 \times 10^{-4}$ ). The  
113 lowest heterozygosity rates were found in *M. m. brevicaudus* ( $1.60 \times 10^{-3} \pm 1.40 \times 10^{-4}$ ) and *M. m.*  
114 *tcheliensis* ( $1.32 \times 10^{-3} \pm 3.14 \times 10^{-4}$ ) (Supplementary Fig. 3).

115 We reconstructed a neighbor-joining (NJ) tree for Chinese RMs based on autosomal SNPs,  
116 using Indian RMs and *M. sylvanus* as outgroups (Fig. 1b and Supplementary Fig. 4). Individuals  
117 from *M. m. lasiotis*, *M. m. brevicaudus* and *M. m. tcheliensis* form monophyletic lineages  
118 respectively, while *M. m. mulatta* and *M. m. littoralis* are paraphyletic. Next, we performed a  
119 population structure analysis using STRUCTURE (version 2.3.4) [25], which estimates  
120 individual ancestry and admixture proportions assuming  $K$  ancestral populations. Plots of  $\Delta K$   
121 generated from STRUCTURE results indicated five genetic clusters present in the full data set  
122 (Fig. 1b and Supplementary Fig. 5). A principal component analysis (PCA) corroborated the  
123 division of Chinese RMs into five groups. The first eigenvector separated *M. m. mulatta* and *M.*  
124 *m. lasiotis* from *M. m. tcheliensis*, *M. m. littoralis* and *M. m. brevicaudus* (variance explained =  
125 7.24%, Tracy-Widom  $P = 4.78 \times 10^{-44}$ ), and the second eigenvector further separated *M. m.*  
126 *tcheliensis*, *M. m. littoralis* and *M. m. brevicaudus* (variance explained = 5.69%, Tracy-Widom  $P$   
127 =  $4.21 \times 10^{-27}$ ) (Fig. 1c, Supplementary Table 4). The division of Chinese RMs into five  
128 geographic lineages supports the former taxonomic division of Chinese RMs into five subspecies  
129 [21, 22]. *M. m. mulatta* (YN1-5) and *M. m. lasiotis* (SC1-4, SX) form the pan-western  
130 populations of Chinese RMs, with both subspecies inhabiting the montane Tibetan Plateau  
131 regions with an altitude  $\geq 1500$  meters above sea level in western China and separated from each  
132 other by the Yangtze River. *M. m. littoralis* (AH, FJ, HB, GX, GZ), *M. m. tcheliensis* (TH) and  
133 *M. m. brevicaudus* (HN) occur in the eastern coastal lowland of China and form the pan-eastern  
134 population. *M. m. tcheliensis* from the Taihang Mountains area (TH) is the northernmost  
135 ( $34^{\circ}54' - 35^{\circ}16' N$ ;  $112^{\circ}02' - 112^{\circ}52' E$ ), while *M. m. brevicaudus*, restricted to Hainan Island, is  
136 the most southern Chinese RM subspecies.

137

### 138 **Demographic and phylogeographic history**

139 The estimated effective population sizes, based on the number of segregating sites ( $S$ ) and  
140 observed genetic diversity ( $\pi$ ) is approximately 85,250 and 57,000 for Chinese RMs (Table 1). In



1 141 order to infer the ancient demographic history of Chinese RMs, we applied a pairwise sequential  
2 142 Markovian coalescent (PSMC) [26] analysis using ten RM individuals with an average sequencing  
3 143 coverage depth higher than 20× (one individual of *M. m. tcheliensis* and one of *M. m. brevicaudus*,  
4 144 two of *M. m. lasiotis*, three of *M. m. littoralis* as well as three individuals of *M. m. mulatta*). The  
5 145 inferred PSMC trajectories were very similar for all analyzed individuals throughout most of the  
6 146 species' history until ~110 kya reflecting the species' cohesiveness (Fig. 2a). The ancient  
7 147 demographic history of RMs is marked by population fluctuations following the glacial periods  
8 148 during the Pleistocene [27]. Approximately 1200-800 kya all Chinese RMs experienced a  
9 149 population reduction at the time of the Xixiabangma Glaciation (XG), followed by an expansion  
10 150 during the Mid-Pleistocene inter-glaciation (800-200 kya). This expansion was then interrupted by  
11 151 the Penultimate Glaciation (PG, 200-130 kya) when suitable habitat might have been lost leading  
12 152 to a population decline [27]. PSMC analyses also suggested that while *M. m. mulatta* and *M. m.*  
13 153 *lasiotis* stabilized with effective population sizes somewhere around 100 kya, *M. m. tcheliensis*, *M.*  
14 154 *m. littoralis* and *M. m. brevicaudus* went through a dramatic population increase and a subsequent  
15 155 bottleneck reaching a stable effective population size somewhere around 60-50 kya (Fig. 2a).  
16 156 Interestingly, the demographic inference by Xue et al. [6] derived from genomic data of a single  
17 157 Chinese RM (CH\_37945) from AH (*M. m. littoralis*) qualitatively resembled the demographic  
18 158 trajectory of *M. m. littoralis* presented herein.

19 159 To further describe the divergence process among the five Chinese RM subspecies, we also  
20 160 employed the SVDquartes approach [28-31] that takes incomplete lineage sorting into account.  
21 161 The obtained phylogenetic tree suggests a “step-by-step” divergence of the five subspecies.  
22 162 Accordingly, the *M. m. mulatta* lineage diverged from that of the remaining Chinese RMs firstly  
23 163 and then the *M. m. lasiotis* diverged from the ancestral lineage of pan-eastern RMs (*M. m.*  
24 164 *tcheliensis*, *M. m. littoralis* and *M. m. brevicaudus*). Subsequently, *M. m. brevicaudus* diverged  
25 165 from the ancestor of *M. m. tcheliensis* and *M. m. littoralis*, the divergence of which occurred lastly  
26 166 (Supplementary Fig. 6). Under this “step-by-step” divergence scenario, we performed the joint site  
27 167 frequency spectrum (SFS) based approach implemented in *fastsimcoal2* [32] to model  
28 168 demographic fluctuations, respective divergence times and gene flow events among the five RM  
29 169 subspecies. Following the divergence between the ancestral lineages of Indian and Chinese RMs  
30 170 (~162 kya), the ancestor of *M. m. mulatta* diverged from the remaining Chinese RMs ~115.8 kya

171 near the end of the last interglacial (Fig. 2b) [6, 13]. Subsequently, *M. m. lasiotis* diverged from  
172 the ancestral lineage of pan-eastern RMs ~111.9 kya. The divergence time between *M. m.*  
173 *brevicaudus* and the ancestor of *M. m. tcheliensis* and *M. m. littoralis* was estimated at ~70.4 kya,  
174 while the divergence between the latter two occurred ~ 44.8 kya at the beginning of the period  
175 leading to the last glacial maximum [33,34]. Interestingly, the coalescence analysis revealed a  
176 bottleneck in population size ( $N_{A1} = 2.0k$  and  $N_{A2} = 1.5k$ ) of pan-eastern RMs during the period  
177 from 111.9 kya to 44.8 kya (Fig. 2b), which coincided with the population decline of pan-eastern  
178 RMs since approximate 100 kya revealed by PSMC analyses. However, the population growth  
179 that occurred in pan-eastern RMs after the bottleneck has not been detected by PSMC analyses,  
180 probably because PSMC is less accurate when reconstructing recent histories within ~100 kya [6].  
181 Gene flow after the divergence of subspecies occurred among almost all five lineages (Fig. 2b and  
182 Supplementary Table 5).

183 A previous study of mitochondrial DNA identified two major haplogroups dividing Chinese  
184 RMs into a western and an eastern clade. Modern Chinese RMs were thought to have undergone a  
185 northward expansion while entering China via two possible routes: the first into the western  
186 mountains and the second following the eastern coast [35]. Our evolutionary model, however,  
187 suggests a “step-by-step” colonization process of RMs in China (Fig 2c). After the divergence  
188 from the Indian population (~162 kya) [6, 13], the ancestor of Chinese RMs colonized the Tibetan  
189 Plateau from southwestern China, and then experienced a range expansion north and eastwards.  
190 The pan-western population (*M. m. mulatta* and *M. m. lasiotis*) inhabited the western montane  
191 region in China, while the pan-eastern population (*M. m. tcheliensis*, *M. m. littoralis* and *M. m.*  
192 *brevicaudus*) entered the eastern coastal region. Barriers such as the Yellow, Yangtze and Pearl  
193 rivers and open sea (Fig. 1a) led to further differentiation, limiting gene flow among them. Water  
194 bodies and mountains could therefore be described as driving the formation of a habitat ‘lattice’  
195 with the different subspecies of RMs occupying different grids in the lattice.

### 197 **Signatures of selection and local adaptation**

198 The wide distribution of Chinese RMs and their respective contrasting habitat types, as well as  
199 their wide use in biomedical studies, makes them an important case study for the analysis of  
200 signatures of local adaptation to divergent selective pressures [36-38]. We identified putative

1 201 targets of selection by carrying out pair-wise comparisons between RM subspecies inhabiting the  
2 202 most different environments to increase the chance of finding selection signatures, i.e., *M. m.*  
3 203 *tcheliensis* that occurs in the northernmost range of the species under cold conditions, and *M. m.*  
4 204 *brevicaudus* that inhabits the southernmost range of the species, a tropical island. For each  
5 205 analysis, we compared the five subspecies using the fixation index ( $F_{ST}$ ) and genetic diversity  
6 206 ( $\theta_{\pi}$ ), calculated on 50kb long sliding windows (Fig. 3 and Supplementary Figs. 7-12). The top 5%  
7 207 of the windows with the largest  $F_{ST}$  and  $\theta_{\pi}$  ratios ( $\theta_{\pi 2} / \theta_{\pi 1}$ ) in each pair-wise comparison were  
8 208 considered to be potentially under positive selection. For each subspecies, we identified the  
9 209 intersection of potential selective-sweep regions generated by all the pair-wise comparisons  
10 210 between a subspecies and each of the other subspecies (four pairwise comparisons in each case)  
11 211 (Supplementary Fig. 7). We used these consistent selective-sweep regions for further analyses, as  
12 212 they represent robust putative positively selected regions. The sizes of candidate selective-sweep  
13 213 regions ranged from 0.100 Mb to 11.075 Mb and the number of genes located in these regions,  
14 214 which are expected to represent targets of selection for each subspecies, varied from 6 to 176 in  
15 215 different subspecies (Supplementary Table 6).

16 216 *M. m. tcheliensis* from the Taihang (TH) Mountains area is the northernmost population of  
17 217 the species. The TH Mountains are characterized by a continental monsoon climate, and  
18 218 conditions for RMs are harsh during winter and early spring with extreme cold temperatures of –  
19 219 14°C [39]. Food resources are limited and consist mainly of barks, twigs, roots of crops and  
20 220 withered grass, thus, all sources are high in fiber, but low in energy and nutritional value [40, 41].  
21 221 Therefore, *M. m. tcheliensis* suffers from starvation due to food shortage during winter and early  
22 222 spring. In starvation, blood glucose levels are maintained by gluconeogenesis through which  
23 223 glucose are converted from other molecules, such as amino acids and lactic acid [42]. Among the  
24 224 176 genes found to be under positive selection in *M. m. tcheliensis*, two (*Fbp1*, *Fbp2*, modified  
25 225 Fisher Exact  $P=1.90E-02$ ; Fig. 3c, d; Supplementary Table 7) are enriched in the gene ontology  
26 226 (GO) term “fructose 1, 6-bisphosphate 1-phosphatase activity”. These two genes encode for  
27 227 fructose-1, 6-bisphosphatase 1 and fructose-1, 6-bisphosphatase isozyme 2 which catalyze the  
28 228 hydrolysis of fructose 1, 6-bisphosphate and play a rate-limiting role in gluconeogenesis.  
29 229 Furthermore, in starved zebrafish it was shown that the expression of *Fbp1* was significantly  
30 230 unregulated in brain and liver tissues [43]. The positive selection genes are also enriched in other

1 231 terms and pathway related to gluconeogenesis, including KEGG pathway “Fructose and mannose  
2 232 metabolism” (modified Fisher Exact  $P=4.35E-02$ ) and GO terms “hexose biosynthetic process”,  
3  
4 233 “monosaccharide biosynthetic process” and “cellular carbohydrate biosynthetic process”  
5  
6 234 (modified Fisher Exact  $P=3.36E-02$ ,  $P=4.64E-02$  and  $P=2.65E-02$ ; Supplementary Table 7). Our  
7  
8 235 findings suggest that the regulation of gluconeogenesis might be a mechanism of *M. m. tcheliensis*  
9  
10 236 to adapt to food shortage in winter.

11  
12 237 According to Bergman’s rule, animals living in cold climates tend to have larger body sizes  
13  
14 238 compared to their relatives in warm climates (i.e. they have a lower surface area to volume ratio),  
15  
16 239 so they radiate less body heat per unit of mass [44]. Consistent with this expectation, among all  
17  
18 240 RM subspecies, *M. m. tcheliensis* exhibits the largest body size and mass, the longest forearm  
19  
20 241 length and the largest head and chest circumference (Fig. 3b and Supplementary Table 8) [40, 45].  
21  
22 242 Among the consistent signatures of positive selection identified in *M. m. tcheliensis* (176 genes),  
23  
24 243 we found signatures of selective sweeps in eight genes linked to limb morphogenesis or skeletal  
25  
26 244 system development (Supplementary Table 6). Among these genes, *Fto* and *Rpgrip11* play an  
27  
28 245 essential role in postnatal growth of mammals [46]. Mice lacking *Fto* completely display  
29  
30 246 immediate postnatal growth retardation with shorter body length, lower body weight, and lower  
31  
32 247 bone mineral density than control animals [47]. Furthermore, *Sox5* and *Sox6* (Fig. 3c, d) play an  
33  
34 248 essential role in synovial joint morphogenesis via promoting both growth plate and articular  
35  
36 249 chondrocyte differentiation [48]. Mutations in *Atp6v0a4* could cause developmental delay and  
37  
38 250 delayed closure of the anterior fontanelle in human [49], while expression of *Ext2* enhances the  
39  
40 251 bone formation in mice [50] These genes involved in the growth and development of the skeletal  
41  
42 252 system and appendages are likely contributors to the larger body size of *M. m. tcheliensis*, and  
43  
44 253 represent an undescribed adaptive pathway for primates living in colder climates.

45  
46  
47 254 In contrast, *M. m. breviceaudus* inhabits the tropical island of Hainan (HN) where it copes  
48  
49 255 with a mean annual temperature of 24°C. *M. m. breviceaudus* has the smallest body size, the  
50  
51 256 smallest body mass, and the shortest tail among RM subspecies [45]. As described above, they  
52  
53 257 radiate more body heat per unit of mass (Bergman’s rule) [44]. We found 127 putatively selected  
54  
55 258 genes in *M. m. breviceaudus* (Supplementary Table 6), four of which were found to be enriched in  
56  
57 259 GO term “Bone morphogenetic protein (BMP) signaling pathway” (modified Fisher Exact  
58  
59 260  $P=4.65E-02$ ; Supplementary Table 9) and two genes were found to be enriched in GO term

1 261 “I-SMAD binding (modified Fisher Exact  $P=4.65E-02$ ; Supplementary Table 9)”. BMP and  
2 262 I-SMAD signaling pathways are involved in the development of bones and the skeleton [51, 52].  
3  
4 263 Mutations in *Axin1*, a gene of the I-SMAD pathway, cause kinked tails in mice [53]. In *M. m.*  
5  
6 264 *brevicaudus*, we found two non-synonymous mutations in this gene (A674G, T656I)  
7  
8 265 (Supplementary Fig. 13 and Supplementary Table 10, 11).

9  
10 266 Additionally, putatively selected genes in *M. m. brevicaudus* (Fig. 3c, d, Supplementary  
11  
12 267 Table 6) were also involved in GO terms related to cardiovascular system and blood circulation.  
13  
14 268 For example, *Aggf1* related to GO term “blood vessel morphogenesis” and *Ctnna3* related to GO  
15  
16 269 term “regulation of heart rate by cardiac conduction”. The up-regulated *Aggf1* expression is  
17  
18 270 capable of increasing blood flow in mouse hindlimb [54]. In addition, *Hspa4*, heat shock 70kDa  
19  
20 271 protein 4, is directly involved in GO term “response to temperature stimulus”. We thus  
21  
22 272 hypothesize that the cardiovascular system of *M. m. brevicaudus* might play an important role in  
23  
24 273 stabilizing body temperature, assisted by blood flow through different body parts requiring good  
25  
26 274 fluidity and vascular permeability to transfer heat out of the body [55]. Testing these hypotheses  
27  
28 275 needs further functional assays, however, these genes, together with the positively selected genes  
29  
30 276 identified in *M. m. tcheliensis*, are known to be relevant to human physical function, and thus are  
31  
32 277 likely of importance in the adaptation of Chinese RMs to different climate conditions.

33  
34 278 Both coding and non-coding changes could contribute to local adaptations of organisms [56].  
35  
36 279 To further investigate the adaptive mechanism of *M. m. tcheliensis* and *M. m. brevicaudus* to the  
37  
38 280 opposite climates (cold versus hot), we focused on SNPs in the gene regions of above described  
39  
40 281 candidate genes. A total of 5817 SNPs were found with significant differences at the 5% level in  
41  
42 282 the distributions of genotypes between these two subspecies, and 10 SNPs were non-synonymous  
43  
44 283 variants (Supplementary table 10 and 11). In *M. m. tcheliensis*, non-synonymous mutations were  
45  
46 284 found in the coding regions of *Atp6v0a4* (R667Q), *Ext2* (I363M), *Fto* (N10S) and *Rpgrip11*  
47  
48 285 (R1281Q) (Supplementary table 11 and Supplementary Fig. 13), implying that selection might has  
49  
50 286 acted on protein sequence changes. No non-synonymous changes were detected in *Fbp1*, *Fbp2*,  
51  
52 287 *Sox5* and *Sox6*. However, SNPs are located in the 1kb up/downstream, 5' and 3' UTR, and  
53  
54 288 intronic regions of these genes (Supplementary table 10), indicating selection on non-coding  
55  
56 289 regulatory variants. Correspondingly, non-synonymous mutations in *Aggf1* (H343Y), *Axin1*  
57  
58 290 (A674G, T656I), *Hspa4* (I782V) and *Ctnna3* (V551I, T577M) were revealed for *M. m.*

291 *brevicaudus* (Supplementary table 11 and Supplementary Fig. 13).

292 Besides the genes related to the adaptation to various climate conditions, we also found  
293 signatures of positive selection in genes related to the nervous system. In *M. m. tcheliensis* the  
294 176 identified candidate genes are enriched in GO term “synaptic” (modified Fisher Exact  
295  $P=1.38E-02$ ; Supplementary Table 10) with eight genes, and two of these gene, *Gabra2* and  
296 *Chrm2* are associated with alcohol dependence [57]. For *M. m. brevicaudus*, 18 putatively  
297 selected genes related to nervous system development were found. For example, *Dcc* is reported  
298 to be required for long-term potentiation and memory [58]. *Auts2*, one of the eight putatively  
299 selected genes in *M. m. lasiotis*, has been shown to regulate neuronal migration, and mutations in  
300 this gene cause mental dysfunction in human [59] (Supplementary Table 7). Our findings suggest  
301 that RM subspecies have experienced different adaptative processes in the nervous system and  
302 respective genomic differences should be taken into account when animals are selected for  
303 neurobiological research.

304

### 305 **Disease-causing variants and implication for biomedical research**

306 Given the large evolutionary similarity between macaques and humans, human diseases are  
307 better modeled in RMs than in many other animals. Thus, variants in RMs that match to  
308 orthologous human variants annotated as ‘pathogenic’ are of particular interest. We examined  
309 presumed homologous Chinese RM SNPs in the human genome and a total of 34,850,330 RM  
310 SNPs analyzed in this study were successfully identified in the human genome (hg19). Among  
311 these SNPs, 118 variants matched human variants with the accordant reference alleles and  
312 alternative alleles were annotated as ‘disease causing’ in HGMD or pathogenic in ClinVar. These  
313 118 RM SNPs affect genes that cause specific human diseases including acromesomelic  
314 dysplasia maroteaux type, anonychia, atransferrinemia, blau syndrome, Carcinoma of colon,  
315 Charcot-Marie-Tooth disease, deafness, early infantile epileptic encephalopathy 7, glycogen  
316 storage disease and others (Supplementary Table 12). Among these 118 SNPs, only seven  
317 pathogenic SNPs are shared by all five subspecies, while 82 are subspecies-specific (Fig. 4c,  
318 Supplementary Table 12). For example, the SNP rs116229331 in the gene *Unc13d* (human Chr17:  
319 73836585C>T), known to cause juvenile idiopathic arthritis in humans [60], has a RM  
320 homologue (RM Chr16: 69559126 C>T, Fig. 4a) that is present in *M. m. tcheliensis*, *M. m.*



1 321 *brevicaudus* and *M. m. littoralis*, but absent in *M. m. lasiotis* and *M. m. mulatta*. Another  
2 322 pathogenic variant (rs397514345, human Chr3: 15686724 A>C) in the *Btd* gene is involved in  
3 323 biotinidase deficiency [61]. Its homologous RM variant (RM Chr2: 172277927 A>C, Fig. 4a) is  
4 324 found only in *M. m. lasiotis* and *M. m. mulatta*. In addition, we also identified 16  
5 325 non-synonymous SNPs in the *Noca3* gene, which encodes a protein that modulates the  
6 326 replication and transcriptional reactivation of HIV-1 during virus latency [62] (Fig. 4b). Ten of  
7 327 these 16 non-synonymous SNPs are private to one subspecies (Supplementary Table 13). The  
8 328 effects of these variants on HIV-1 replication and reactivation are unknown and need further  
9 329 investigation, but the high number of mutations suggests a complex response of the host to the  
10 330 virus.

11 331 Overall, these findings suggest that the genomic architecture of Chinese RMs used in  
12 332 biomedical research and their geographic origin could strongly influence the outcome of  
13 333 biomedical experiments and should be taken into account when using Chinese RMs in clinical and  
14 334 neurobiological research. Unfortunately, genome wide screening of RMs used in biomedical  
15 335 research is so far only rarely conducted and uncharacterized animals are most often used.  
16 336 Importantly, individuals from all five Chinese RM subspecies are used in biomedical research [63,  
17 337 64]. Combined with our data, nine of the 26 captive Chinese RMs reported by Zhong *et al.* [7]  
18 338 were found to cluster with *M. m. littoralis*, 16 with *M. m. lasiotis* and one with *M. m. mulatta* (Fig.  
19 339 4d). Thus, the data and results presented here provide the basis to trace the origin of captive RMs  
20 340 and to allow for the selection of appropriate animal models when testing for particular diseases,  
21 341 and are thus a significant contribution to the “3Rs” principle, which aims to reduce, refine, and  
22 342 replace experimental animals [65].

## 343 **Conclusion**

344 We present the first description of the evolutionary history and genomic variation of  
345 geo-referenced wild RMs throughout China, including scenarios on potential functions of this  
346 variation in adaptation to local environments. This genomic resource represents a valuable  
347 contribution to the understanding of the biology and evolution of a highly successful and  
348 important biomedical research species. In particular, it is important to note that due to the  
349 difference in evolutionary history of the subspecies identified here, it can be expected that  
350 animals originating from different regions may react differently to experimental tests, and thus  
351 their background needs to be assessed beforehand [10]. Our results highlight the importance that  
352 genome typing can play in biomedical research where animal origins are uncertain, and the  
353 resources generated here provide a baseline for genomic assessment of biomedical research  
354 populations, genetic resource conservation and for refined usage of RMs in future research.

## 356 **Materials and Methods**

### 357 **Ethics statement**

358 The methods were carried out in accordance with the approved guidelines of the Good  
359 Experimental Practices adopted by the Institute of Zoology, Chinese Academy of Sciences  
360 (CAS). All experimental procedures and animal collection were conducted under the supervision  
361 of the Committee for Animal Experiments of the Institute of Zoology, Chinese Academy of  
362 Sciences.

### 363 **Sample Collection and Sequencing**

364 Samples from 79 individuals with information about geographic origin were collected from 17  
365 local wildlife rescue center, which covered most of the species' range in China. Muscle samples  
366 were collected from deceased individuals and the blood samples were taken during routine  
367 physical examinations. Total genomic DNA was extracted from blood or tissue samples using  
368 standard phenol/chloroform methods. For each individual, ~3 µg DNA was sheared into  
369 fragments of 500 bp with the Covaris system. DNA fragments were then processed and  
370 sequenced using the Illumina HiSeq 2000 and 2500 platform. Furthermore, published genomic  
371 data for two individuals were download form NCBI [9,23] and filtered using the same conditions.  
372 Raw reads were first filtered with the following criteria: (1) reads with unidentified nucleotides  
373 (N) exceeded 10% were discarded, (2) reads with the proportion of low quality base (phred  
374 quality <=5) larger than 50% were discarded. After the quality control, a total of 2,736.91 Gb of  
375 high quality sequences with 22.53 billion pair-end reads (100 or 125 bp) were generated.

### 377 **Sequence Data Pre-processing and Variant Calling**

378 High-quality sequence reads were mapped to the macaque reference genome, Mmul\_8.0.1 [66],  
379 using the Burrows–Wheeler Aligner (BWA) (0.7.10-r789) [67]. Sequence Alignment/Map (SAM)  
380 format files were imported to SAMtools (v0.1.19) [68] for sorting and then imported to Picard  
381 (<http://broadinstitute.github.io/picard/>, version 1.118) for removing duplicated reads. To improve  
382 the quality of sites reported, we performed SNP calling following GATK's best practice, version  
383 3.3–0 (GATK, RRID: SCR\_001876) on autosomal sites only [69]. We get the GVCF file for  
384 each individual using the HaplotypeCaller method in GATK and then using the GATK with the

1 385 GenotypeGVCFs-based method to get the population GVCF for all samples. After SNP calling,  
2 386 we applied the command “SelectVariants” and “VariantFiltration” to exclude Indel and potential  
3  
4 387 false-positive variant calls. All the SNPs were annotated by ANNOVAR (v2013-06-21) [70]  
5  
6 388 (Supplementary Table 2). For each individual the heterozygosity was calculated as heterozygous  
7  
8 389 SNP rate across the whole genome (Supplementary Table 3).  
9

10 390

### 11 391 **Genetic Diversity and Structure Analysis**

12 392 A neighbor-joining (NJ) tree was constructed for the 81 individuals based on the autosomal  
13  
14 393 genome data using the software TreeBeST. The bootstrap was set to 1,000 times to assess branch  
15  
16 394 support, with the genome information of Indian RMs and *M. sylvanus* as outgroups. FigTree  
17  
18 395 (<http://tree.bio.ed.ac.uk/software/figtree/>, v1.4.0) was used to visualize the phylogenetic tree (Fig.  
19  
20 396 1b and Supplementary Fig. 4). Population structure analysis was performed using the software  
21  
22 397 STRUCTURE 2.3.4 [25], which estimates individual ancestry and admixture proportions  
23  
24 398 assuming  $K$  ancestral populations. We ran STRUCTURE five times to assess convergence and  
25  
26 399 tested the number of genetic clusters ( $K$ ) from 2-9 (Supplementary Fig. 5). We also carried out a  
27  
28 400 principle component analysis (PCA) using the smartPCA program from the Eigensoft package  
29  
30 401 (v5.0) [71]. To determine the significance level of principal components, a Tracy-Widom test  
31  
32 402 was done after the PCA (Supplementary Table 4). Decay of linkage disequilibrium against  
33  
34 403 physical distance for the different populations was calculated using the Haploview software [72]  
35  
36 404 with the maxdistance set as 500kb (Supplementary Fig. 14).  
37  
38  
39  
40  
41  
42

43 405

### 44 406 **Demographic and Divergence Inference Using PSMC and Fastsimcoal2**

45 407 The PSMC model [26] was used to estimate the population histories from the individual genomes  
46  
47 408 (sex chromosomes excluded) with the following parameters:  $-N25 -t15 -r5 -p '4+25 \times 2+4+6'$ .  
48  
49 409 We chose a generation length of 11 years and a mutation rate per generation ( $\mu$ ) of  $1.0 \times 10^{-8}$  (for  
50  
51 410 the rationale to use these values see [6, 73]). To ensure the quality of consensus sequences, we  
52  
53 411 used data of ten individuals with an average coverage  $>20 \times$  (22.20-34.32 $\times$ ).  
54  
55

56 412 We used PAUP\* 4.0a142 [30] for Linux to run SVDquartets to estimate the branching pattern  
57  
58 413 among the five subspecies with the following command: SVDQuartets SpeciesTree=yes bootstrap  
59  
60 414 evalQuartets=all seed=0 nthreads=40. The joint site frequency spectrum (SFS) approach  
61  
62  
63  
64  
65

1 415 implemented in *fastsimcoal2* [32] was performed to model more recent demographic fluctuations  
2 416 and respective divergence times based on the species tree estimation by SVDquartets. To mitigate  
3 417 the effect of linkage disequilibrium, we took one SNP every 10kb, and then SNPs located 10 kb  
4 418 away from genes, were used to convert SFS. The parameters used in *fastsimcoal2* were: -N  
5 419 100000 (max. number of simulations), -L 40 (max. number of EM cycles), - M 0.001 (min.  
6 420 relative difference in parameter values for the stopping criterion). Two hundred replicates from  
7 421 different initial conditions were run to ensure convergence. Migration rates were ignored between  
8 422 subspecies which have no direct connection. The outputs of this scenario were processed with  
9 423 arlsumstat to obtain distributions of various summary statistics (Supplementary Table 5).  
10  
11  
12  
13  
14  
15  
16  
17  
18  
19  
20

### 21 425 **Positive Selection**

22  
23 426 To identify genomic regions that may have been subject to selection for each subspecies  
24 427 inhabited in different habitats, we scanned the genome using one-to-one pair-wise comparisons  
25 428 between all five subspecies. We calculated the genome-wide distribution of  $F_{ST}$  values [74] and  
26 429  $\theta_\pi$  ratios for each pairwise comparison among five RM subspecies. We calculated  $\theta_\pi$  for each  
27 430 population and the  $F_{ST}$  between the two populations in each comparison using VCFtools [75]  
28 431 with a genome-wide sliding window strategy (50-kb in length with 25-kb step). The  $F_{ST}$  values  
29 432 were Z-transformed and the log value of  $\theta_\pi$  ratio ( $\theta_{\pi 2} / \theta_{\pi 1}$ ) was estimated. Candidate regions  
30 433 under positive selection were extracted based on the top 5% of log-odds ratios for both Z ( $F_{ST}$ )  
31 434 and log ( $\theta_\pi$ -ratio). Finally, for each subspecies we used the intersection of putatively selected  
32 435 regions generated by all the pair-wise comparisons with other subspecies as the candidate  
33 436 regions under positive selection (i.e. consistent signatures of selective sweeps). Genes located in  
34 437 these regions are expected to represent targets of selection. Functional classification and  
35 438 enrichment analysis of GO categories and KEGG pathways for these candidate genes were  
36 439 performed using DAVID (v6.8) [76]. The modified Fisher Exact  $P$ -value cut off was 0.05.  
37 440 Chi-square and  $P$ -values for the allele frequencies in *M. m. tcheliensis* vs. *M. m. brevicaudus* for  
38 441 the re-sequenced SNPs from the candidate genes were assessed with the Haploview program  
39 442 [72].  
40  
41  
42  
43  
44  
45  
46  
47  
48  
49  
50  
51  
52  
53  
54  
55  
56  
57  
58  
59

### 60 444 **Genomic divergence and implication for biomedical research**

1 445 A total of 118 out of 58,682,158 RM SNPs analyzed in this study were successfully mapped to  
2  
3 446 human reference sequence version hg19 (GRCh37) using liftOver  
4  
5 447 (<https://genome.ucsc.edu/cgi-bin/hgLiftOver>) and were annotated as ‘disease causing’ in HGMD  
6  
7 448 (version 2015.1) or pathogenic in ClinVar (downloaded 25/02/2018) (Supplementary Table 12).

8  
9 449  
10 450 For more details of methods please see supplementary notes in Supplementary Material.

11  
12 451

## 13 14 15 452 **Data Access**

16  
17 453 All data generated from this study have been submitted to the NCBI Sequence Read Archive  
18  
19 454 (SRA) under BioProject PRJNA345528.

20  
21 455

## 22 23 24 456 **Competing interests**

25  
26 457 The authors declare that they have no competing interests.

27  
28 458

## 29 30 31 459 **Acknowledgments**

32  
33 460 This project was sponsored by the following grants: Ming Li (Key Project of National Natural  
34  
35 461 Science Foundation of China, 31530068; Strategic Priority Research Program of the Chinese  
36  
37 462 Academy of Sciences, XDPB0202 and XDA19050202; and National Key R&D Program of  
38  
39 463 China, 2016YFC0503200); Zhijin Liu (Natural Science Foundation of China, 31471989). The  
40  
41 464 authors thank Baoguo Li, Meng Yao, Songtao Guo, Jiqi Lu, Zhenlong Wang, Xuelong Jiang,  
42  
43 465 Tao Meng and Qihai Zhou for their help in sampling; Daniel Pitt, Quan Kang, Qi Wu and Qi Pan  
44  
45 466 for their assistance in data analysis.

## 46 47 48 467 **Author contributions**

49  
50 468 M. L., Z. L. and M. B conceived the study and designed the project. Z. L., X. T., P. O., X. Z., L.  
51  
52 469 Z. and S. T. managed the project, performed the analyses and wrote the manuscript. Z. L., B. S.  
53  
54 470 and H. X. prepared samples. Z. L., X. T. and P. O. performed genetic analyses. Z. L., X. T., P. O.,  
55  
56 471 B. R., L. Z., G. L., Z. Y., Z. P., Z. X., C. R., M. B. and M. L. discussed the data. Z. L. and X. T.  
57  
58 472 wrote the manuscript with contributions from P. O., B. W., H. X., W. Z., C. R., M. B. and M. L.;



1 473 all authors contributed to data interpretation.  
2

3 **474 Supplementary Material**  
4

5 475 Supplementary information, figures S1-S14, tables S1-S13, and notes are available on line.  
6  
7  
8  
9  
10  
11  
12  
13  
14  
15  
16  
17  
18  
19  
20  
21  
22  
23  
24  
25  
26  
27  
28  
29  
30  
31  
32  
33  
34  
35  
36  
37  
38  
39  
40  
41  
42  
43  
44  
45  
46  
47  
48  
49  
50  
51  
52  
53  
54  
55  
56  
57  
58  
59  
60  
61  
62  
63  
64  
65

## References

1. Moreno-Estrada A, Gignoux CR, Fernández-López JC et al. Human genetics. The genetics of Mexico recapitulates Native American substructure and affects biomedical traits. *Science* 2013; **344**:1280–1285.
2. Allentoft ME, Sikora M, Sjögren KG et al. Population genomics of Bronze Age Eurasia. *Nature* 2015; **522**:167–172.
3. Sudmant PH, Rausch T, Gardner EJ et al. An integrated map of structural variation in 2,504 human genomes. *Nature* 2015; **526**:75–81.
4. Maestripieri D. *Macachiavellian intelligence: How rhesus macaques and humans have conquered the world*. 2007. The University of Chicago Press, Chicago.
5. Zinner D, Fickenscher GH, Roos C. Family Cercopithecidae (Old World Monkeys). *Handbook of the Mammals of the World*. 2013; Pp. 550-753 in: Mittermeier RA, Rylands AB, Wilson DE. eds. Vol. 3. Primates. Lynx Edicions, Barcelona.
6. Xue C, Raveendran M, Harris RA et al. The population genomics of rhesus macaques (*Macaca mulatta*) based on whole genome sequences. *Genome Res* 2016; **26**:1651–1662.
7. Zhong X, Peng J, Shen QS et al. RhesusBase PopGateway: Genome-Wide Population Genetics Atlas in Rhesus Macaque. *Mol Biol Evol* 2016; **33**:1370–1375.
8. Fawcett GL, Raveendran M, Deiros DR et al. Characterization of single-nucleotide variation in Indian-origin rhesus macaques (*Macaca mulatta*). *BMC Genomics* 2011; **12**:311.
9. Yan G, Zhang G, Fang X et al. Genome sequencing and comparison of two nonhuman primate animal models, the cynomolgus and Chinese rhesus macaques. *Nature Biot* 2011; **29**:1019-1023.
10. Haus T, Ferguson B, Rogers J et al. Genome typing of nonhuman primate models: implications for biomedical research. *Trends Genet* 2014; **30**:482–487.
11. Flynn S, Satkoski J, Lerche N et al. Genetic variation at the TNF-alpha promotor and malaria susceptibility in rhesus (*Macaca mulatta*) and long-tailed (*Macaca fascicularis*) macaques. *Infect Genet Evol* 2009; **9**:769–777.
12. de Groot NG, Heijmans CMC, Koopman G et al. TRIM5 allelic polymorphism in macaque species/populations of different geographic origins: its impact on SIV vaccine studies. *Tissue*

- 1 505 Antigens. 2011; **78**:256–62.
- 2 506 13. Hernandez RD, Hubisz MJ, Wheeler DA et al. Demographic histories and patterns of linkage
- 3 507 disequilibrium in Chinese and Indian rhesus macaques. *Science* 2007; **316**:240–243.
- 4 508 14. Champoux M, Higley JD, Suomi SJ. Behavioral and physiological characteristics of Indian
- 5 509 and Chinese-Indian hybrid rhesus macaque infants. *Dev Psychobiol* 1997; **31**:49–63.
- 6 510 15. Trichel AM, Rajakumar PA, Murphey-Corb M. Species-specific variation in SIV disease
- 7 511 progression between Chinese and Indian subspecies of rhesus macaque. *J Med Primatol* 2002;
- 8 512 **31**:171–178.
- 9 513 16. Tosi AJ, Morales JC, Melnick DJ. Paternal, maternal, and biparental molecular markers
- 10 514 provide unique windows onto the evolutionary history of macaque monkeys. *Evolution* 2003;
- 11 515 **57**:1419–1435.
- 12 516 17. Smith DG. Genetic characterization of Indian-origin and Chinese-origin rhesus macaques
- 13 517 (*Macaca mulatta*). *Comp Med* 2005; **55**:227–230.
- 14 518 18. Ferguson B, Street SL, Wright H et al. Single nucleotide polymorphisms (SNPs) distinguish
- 15 519 Indian-origin and Chinese-origin rhesus macaques (*Macaca mulatta*). *BMC Genomics* 2007;
- 16 520 **8**:43.
- 17 521 19. Kubisch HM, Falkenstein KP, Deroche CB et al. Reproductive efficiency of captive Chinese-
- 18 522 and Indian-origin rhesus macaque (*Macaca mulatta*) females. *Am J Primatol* 2012; **74**:174–
- 19 523 184.
- 20 524 20. Kanthaswamy S, Johnson Z, Trask JS et al. Development and validation of a SNP-based assay
- 21 525 for inferring the genetic ancestry of rhesus macaques (*Macaca mulatta*). *Am J Primatol* 2014;
- 22 526 **76**:1105–1113.
- 23 527 21. Fooden J. Systematic review of the rhesus macaque, *Macaca mulatta* (Zimmermann, 1780).
- 24 528 *Field Zool* 2000; **96**:1–180.
- 25 529 22. Jiang X, Wang Y, Ma S. Taxonomic revision and distribution of subspecies of rhesus monkey
- 26 530 (*Macaca mulatta*) in China. *Zool Res* 1991; **12**:241–247.
- 27 531 23. Fang X, Zhang Y, Zhang R et al. Genome sequence and global sequence variation map with
- 28 532 5.5 million SNPs in Chinese rhesus macaque. *Genome Biol* 2011; **12**:R63.
- 29 533 24. Prado-Martinez J, Sudmant PH, Kidd JM et al. Great ape genetic diversity and population
- 30 534 history. *Nature* 2013; **499**:471–475.

- 1 535 25. Evanno G, Regnaut S, Goudet J. Detecting the number of clusters of individuals using the  
2 536 software STRUCTURE: a simulation study. *Mol Ecol* 2005; **14**:2611–2620.
- 3  
4 537 26. Li H, Durbin R. Inference of human population history from individual whole-genome  
5 538 sequences. *Nature* 2011; **475**:493–496.
- 6  
7  
8 539 27. Zheng B, Xu Q, Shen Y. The relationship between climate change and Quaternary glacial  
9 540 cycles on the Qinghai–Tibetan Plateau: review and speculation. *Quatern Int* 2002; **97**:93–  
10 541 101.
- 11  
12 542 28. Chifman J, Kubatko L. Identifiability of the unrooted species tree topology under the  
13 543 coalescent model with time-reversible substitution processes, site-specific rate variation, and  
14 544 invariable sites. *J Theor Biol* 2014; **374**:35–47.
- 15  
16 545 29. Chifman J, Kubatko L. Quartet inference from SNP data under the coalescent model.  
17 546 *Bioinformatics* 2014; **30**:3317–3324.
- 18  
19 547 30. Swofford, D, et al; PAUP\*. *Phylogenetic Analysis Using Parsimony (\*and other methods).*  
20 548 *Version 4.* Sinauer Associates, Sunderland, Massachussets. 2003.
- 21  
22 549 31. Song S, Liu L, Edwards SV, Wu S. Resolving conflict in eutherian mammal phylogeny using  
23 550 phylogenomics and the multispecies coalescent model. *Proc Natl Acad Sci USA* 2012; **109**:  
24 551 14942–14947.
- 25  
26 552 32. Excoffier, L. Dupanloup I, Huerta-Sánchez E et al Robust demographic inference from  
27 553 genomic and SNP data. *PLoS Genet* 2013; **9**:e1003905.
- 28  
29 554 33. Owen LA, Finkel RC, Caffee MW. A note on the extent of glaciation throughout the Himalaya  
30 555 during the global Last Glacial Maximum. *Quaternary Sci Rev* 2002; **21**:147–157.
- 31  
32 556 34. Owen LA. Latest Pleistocene and Holocene glacier fluctuations in the Himalaya and Tibet.  
33 557 *Quaternary Sci Rev* 2009; **28**:2150–2164.
- 34  
35 558 35. Wu S, Luo J, Li Q et al. Ecological genetics of Chinese rhesus macaque in response to  
36 559 mountain building: all things are not equal. *PLoS ONE* 2013; **8**:e55315.
- 37  
38 560 36. Yi X, Liang Y, Huerta-Sanchez E et al. Sequencing of 50 human exomes reveals adaptation to  
39 561 high altitude. *Science* 2010; **329**:75–78.
- 40  
41 562 37. Bhatia G, Patterson N, Pasaniuc B et al. Genome-wide comparison of African-ancestry  
42 563 populations from CARE and other cohorts reveals signals of natural selection. *Am J Hum*  
43 564 *Genet* 2011; **89**:368–381.

- 1 565 38. Zhao SC, Zheng PP, Dong SS et al. Whole-genome sequencing of giant pandas provides  
2 566 insights into demographic history and local adaptation. *Nat Genet* 2013; **45**:67–71.
- 3  
4 567 39. Tian JD, Wang ZL, Lu JQ, Wang BS, Chen JR. Reproductive Parameters of Female *Macaca*  
5  
6 568 *mulatta tcheliensis* in the Temperate Forest of Mount Taihangshan, Jiyuan, China. *Am J*  
7  
8 569 *Primatol* 2013; **75**:605–612.
- 9  
10 570 40. Zhao X, Zhang H, Lv X et al. Survey and research of morphological characters of monkeys  
11  
12 571 (*Macaca mulatta*) in the Taihang Mountains. *J Henan Nor Uni* 1989; **62**:120–125.
- 13  
14 572 41. Lu JQ, Hou JH, Wang HF, Qu WY. Current status of *Macaca mulatta* in Taihangshan  
15  
16 573 Mountains Area, Jiyuan, Henan, China. *Int J Primatol* 2007; **28**:1085–1091.
- 17  
18 574 42. Sadava DE, Heller HC, Orians GH, Purves WK, Hillis DM. *Life: The Science of Biology*,  
19  
20 575 8th edn. Macmillan, New York; 2008.
- 21  
22 576 43. Drew RE, Rodnick KJ, Settles M et al. Effect of starvation on transcriptomes of brain and  
23  
24 577 liver in adult female zebrafish (*Danio rerio*). *Physiol Genomics* 2008; **35**:283–295.
- 25  
26 578 44. Bergmann C. Über die Verhältnisse der Wärmeökonomie der Thiere zu ihrer Grösse.  
27  
28 579 *Göttinger Studien* 1847; **3**:595–708.
- 29  
30 580 45. Zhang P, Lyu MY, Wu CF et al. Variation in body mass and morphological characters in  
31  
32 581 *Macaca mulatta brevicaudus* from Hainan, China. *Am J Primatol* 2016; **78**:679–698.
- 33  
34 582 46. Jevsinek Skok D, Kunej T, Kovac M et al. FTO gene variants are associated with growth  
35  
36 583 and carcass traits in cattle. *Animal Genetics* 2016; **47**: 219–222.
- 37  
38 584 47. Gao X, Shin YH, Li M, Wang F, Tong Q, Zhang PM. The Fat Mass and Obesity Associated  
39  
40 585 Gene FTO Functions in the Brain to Regulate Postnatal Growth in Mice. *PLoS ONE* 2010; **5**:  
41  
42 586 e14005.
- 43  
44 587 48. Dy P, Smits P, Silvester A et al. Synovial joint morphogenesis requires the chondrogenic  
45  
46 588 action of Sox5 and Sox6 in growth plate and articular cartilage. *Dev Biol* 2010; **341**:346–  
47  
48 589 359.
- 49  
50 590 49. Greally MT, Kalis NN, Agab W et al. Autosomal recessive cutis laxa type 2A (ARCL2A)  
51  
52 591 mimicking Ehlers - Danlos syndrome by its dermatological manifestations: Report of three  
53  
54 592 affected patients. *Am J Med Genet A* 2014; **164A**:1245–1253.
- 55  
56 593 50. Morimoto K, Shimizu T, Furukawa K, Morio H, Kurosawa H, Shirasawa T. Transgenic  
57  
58 594 expression of the EXT2 gene in developing chondrocytes enhances the synthesis of heparan  
59  
60  
61  
62  
63  
64  
65

- 1 595 sulfate and bone formation in mice. *Biochem Biophys Res Commun* 2002; **292**: 999–1009.
- 2 596 51. Salazar VS, Gamer LW, Rosen V. BMP signaling in skeletal development, disease and
- 3
- 4 597 repair. *Nat Rev Endocrinology* 2016; **12**:203–221.
- 5
- 6 598 52. Bragdon B, Moseychuk O, Saldanha S et al. Bone Morphogenetic Proteins: A critical review.
- 7
- 8 599 *Cell Signal* 2011; **23**: 609–620.
- 9
- 10 600 53. Ruvinsky A, Flood WD, Costantini F. Developmental mosaicism may explain spontaneous
- 11
- 12 601 reappearance of the AxinFu mutation in mice. *Genesis* 2001; **29**: 49-57.
- 13
- 14 602 54. Lu QL, Yao YH, Yao YF et al. Angiogenic Factor AGGF1 Promotes Therapeutic Angiogenesis
- 15
- 16 603 in a Mouse Limb Ischemia Model. *PLoS ONE* 2012; **7**: e46998.
- 17
- 18 604 55. González-Alonso J. Human thermoregulation and the cardiovascular system. *Exp Physiol*
- 19
- 20 605 2012; **97**:340–346.
- 21
- 22 606 56. Meadows JRS, Lindblad-Toh K. Dissecting evolution and disease using comparative
- 23
- 24 607 vertebrate genomics. *Nat Rev Genet* 2017; **18**, 624–636.
- 25
- 26 608 57. Dick DM, Bierut LJ. *Curr Psychiatry Rep* 2006; **8**: 151.
- 27
- 28 609 58. Horn KE, Glasgow SD, Gobert D et al. DCC expression by neurons regulates synaptic
- 29
- 30 610 plasticity in the adult brain. *Cell Rep* 2010; **31**:173-185.
- 31
- 32 611 59. Hori K, Hoshino M. Neuronal Migration and AUTS2 Syndrome. *Brain Sci* 2017; **7**:e54.
- 33
- 34 612 60. Hazen MM, Woodward AL, Hofmann I et al. Mutations of the hemophagocytic
- 35
- 36 613 lymphohistiocytosis-associated gene UNC13D in a patient with systemic juvenile idiopathic
- 37
- 38 614 arthritis. *Arthritis Rheum* 2008; **58**:567–570.
- 39
- 40 615 61. Procter M, Wolf B and Mao R. Forty-eight novel mutations causing biotinidase deficiency.
- 41
- 42 616 *Mol Genet Metab* 2016; **117**:369–372.
- 43
- 44 617 62. Munier S, Delcroix-Genete D, Carthagena L et al. Characterization of two candidate genes,
- 45
- 46 618 NCoA3 and IRF8, potentially involved in the control of HIV-1 latency. *Retrovirology* 2005;
- 47
- 48 619 **2**:73.
- 49
- 50 620 63. Fan ZY, Song YL. Chinese Primate Status and Primate Captive Breeding for Biomedical
- 51
- 52 621 Research in China. In: Institute for Laboratory Animal Research, National Research Council.
- 53
- 54 622 International Perspectives: The Future of Nonhuman Primate Resources. Washington DC:
- 55
- 56 623 National Academy Press. 2003.
- 57
- 58 624 64. Hao Xin. Monkey Research in China: Developing a Natural Resource. *Cell* 2007; **129**: 1033–

1 625 1036.  
2 626 65. Zhou Q. Balancing the welfare: the use of non-human primates in research. Trends Genet  
3  
4 627 2014; **30**: 476–478.  
5  
6 628 66. Gradnigo JS, Majumdar A, Norgren RB Jr, Moriyama EN. Advantages of an Improved  
7  
8 629 Rhesus Macaque Genome for Evolutionary Analyses. PLoS ONE 2016; **11**: e0167376.  
9  
10 630 67. Li H, Durbin R. Fast and accurate short read alignment with Burrows-Wheeler transform.  
11  
12 631 Bioinformatics 2009; **25**:1754–1760.  
13  
14 632 68. Li H, Handsaker B, Wysoker A et al. The sequence alignment/map format and SAMtools.  
15  
16 633 Bioinformatics 2009; **25**:2078–2079.  
17  
18 634 69. Mckenna A, Hanna M, Banks E, et al. The Genome Analysis Toolkit: a MapReduce  
19  
20 635 framework for analyzing next-generation DNA sequencing data. Genome Res 2010;  
21  
22 636 **20(9)**:1297–303.  
23  
24 637 70. Wang K, Li M, Hakonarson H. ANNOVAR: functional annotation of genetic variants from  
25  
26 638 high-throughput sequencing data. Nucleic Acids Res 2010; **38**: e164.  
27  
28 639 71. Patterson N, Price AL, Reich D. Population structure and eigenanalysis. PLoS Genet 2006;  
29  
30 640 **2**:e190.  
31  
32 641 72. Barrett JC, Fry B, Maller J et al. Haploview: analysis and visualization of LD and haplotype  
33  
34 642 maps. Bioinformatics 2005; **21**:263–265.  
35  
36 643 73. Ségurel L, Wyman M J, Przeworski M. Determinants of mutation rate variation in the human  
37  
38 644 germline. Annu Rev Genomics Hum Genet 2014; **15**: 47–70.  
39  
40 645 74. Weir BS, Cockerham CC. Estimating *F*-statistics for the analysis of population structure.  
41  
42 646 Evolution 1984; **38**:1358–1370.  
43  
44 647 75. Danecek P, Auton A, Abecasis G et al. The variant call format and VCFtools. Bioinformatics  
45  
46 648 2011; **27**:2156–2158.  
47  
48 649 76. Huang da W, Sherman BT, Lempicki RA. Systematic and integrative analysis of large gene  
49  
50 650 lists using DAVID Bioinformatics Resources. Nat Protoc 2009; **4**:44–57.  
51  
52 651  
53  
54  
55  
56  
57  
58  
59  
60  
61  
62  
63  
64  
65

653 **Tables**

654 Table1. Genetic diversity ( $\theta$ ) and effective population size ( $N_e$ ) in Chinese rhesus macaques  
 655 based on segregating sites (S) and nucleotide diversity ( $\pi$ ).  
 656

|                                          | Sample size (n) | S          |        | $\pi$    |        |
|------------------------------------------|-----------------|------------|--------|----------|--------|
|                                          |                 | $\theta_w$ | $N_e$  | $\theta$ | $N_e$  |
| Chinese rhesus macaques<br>(all samples) | 81              | 0.00341    | 85,250 | 0.00228  | 57,000 |
| <i>M. m. littoralis</i>                  | 29              | 0.00292    | 73,000 | 0.00221  | 55,250 |
| <i>M. m. tcheliensis</i>                 | 5               | 0.00188    | 47,000 | 0.00204  | 51,000 |
| Subspecies <i>M. m. breviceaudus</i>     | 5               | 0.00179    | 44,750 | 0.00185  | 46,250 |
| <i>M. m. lasiotis</i>                    | 32              | 0.00287    | 71,750 | 0.00224  | 56,000 |
| <i>M. m. mulatta</i>                     | 10              | 0.00275    | 68,750 | 0.00220  | 55,000 |

657



1  
2  
3  
4  
5  
6  
7  
8  
9  
10  
11  
12  
13  
14  
15  
16  
17  
18  
19  
20  
21  
22  
23  
24  
25  
26  
27  
28  
29  
30  
31  
32  
33  
34  
35  
36  
37  
38  
39  
40  
41  
42  
43  
44  
45  
46  
47  
48  
49  
50  
51  
52  
53  
54  
55  
56  
57  
58  
59  
60  
61  
62  
63  
64  
65

658 **Figure Legends**

659 **Figure 1.** Phylogeny and population genetic structure of 81 wild Chinese RMs. (a) Geographic  
660 distribution of RMs in China (gray shadow) and the 17 sampling sites along with their  
661 subspecies assignment. (b) Neighbor-joining (NJ) tree and clustering solution inferred using  
662 STRUCTURE and displaying five populations (inferred with Evanno's  $\Delta K$  method;  
663 Supplementary Fig. 5). (c) Principal component analysis plots depicting the first two components  
664 (variance explained by PC1 = 7.24% and PC2 = 5.69%).

665 **Figure 2.** Demographic history and differentiation scenarios of Chinese RMs. (a) Historical  
666 changes in effective population size reconstructed using the pairwise sequential Markovian  
667 coalescent (PSMC) applied on individual whole genomes for each of the five subspecies. The  
668 generation length ( $g$ ) and the neutral mutation rate per generation ( $\mu$ ) were assumed to be 11  
669 years and  $1.08 \times 10^{-8}$ , respectively. The Xixiabangma Glaciation (XG, 1,200-800 kya),  
670 Penultimate Glaciation (PG, 200-130 kya) and Last Glaciation (LG, 70-10 kya) are shaded in  
671 gray. (b) Demographic history inferred by *fastsimcoal2*. The width of the gray bars and numbers  
672 on them indicate the estimated effective population size. The arrows indicate migration patterns  
673 with the numbers above arrows indicating the average number of migrants per generation  
674 between different subspecies. Numbers at the right show the divergence times between  
675 subspecies. (c) Biogeographic scenario for RMs. Chinese RMs separates from Indian RMs ~ 162  
676 kya [13], followed by further migration into China by the different RM subspecies indicated with  
677 arrows colored following the color key in Fig. 1a.

678 **Figure 3.** Genomic regions with selection sweep signals in RM. (a) Distribution of  $\log_2(\theta_\pi M. m.$   
679 *lasiotis*/ $\theta_\pi M. m. tcheliensis$ ) and  $Z(F_{ST})$  of 50-kb windows with 25-kb steps. Blue dots located in  
680 the selected regions requirement (corresponding to  $Z$  test  $P < 0.05$ , where  $Z(F_{ST}) \geq 1.848$  and  $\theta_\pi$   
681 log-ratio  $\geq 1.203$ ) represent selected windows for *M. m. tcheliensis*. (b) Morphological  
682 comparison between *M. m. tcheliensis* and *M. m. lasiotis*. M and F represent males and females.  
683 (c) Example of genes with selection sweep signals. *Ext2*, *Rpgrip11*, *Fbp2* and *Fbp1* in *M. m.*  
684 *tcheliensis* and *Axin1*, *Aggf1* and *Hspa4* in *M. m. brevicaudus*.  $F_{ST}$  and  $\theta_\pi$  log-ratio between the  
685 two subspecies are represented in red and blue, respectively. All values in figure 3c are plotted  
686 using 50-kb windows with half steps. Genome annotations are show at the bottom (black bar,  
687 coding sequences (CDS); purple bar, genes). (d) SNP genotypes in putative selective sweeps

1 688 containing *Ext2*, *Rpgrip1l*, *Fbp2*, *Fbp1*, *Axin1*, *Aggf1* and *Hspa4*. (e) Non-synonymous variants  
2  
3 689 in gene *Ext2*, *Rpgrip1l* and *Hspa4*.  
4  
5 690 **Figure 4.** Population study of putative pathogenic SNPs in Chinese RM subspecies. (a) The site  
6  
7 691 and frequency of pathogenic SNPs located in *Unc13d* and *Btd* genes. (b) Scheme of the *Ncoa3*  
8  
9 692 gene in RM. The positions of nonsynonymous polymorphisms (black) and three amino-acid  
10  
11 693 deletions (in red) are marked. (c) Private and shared pathogenic SNPs in Chinese RM subspecies  
12  
13 694 (blue: *M. m. tcheliensis*; orange: *M. m. brevicaudus*; red: *M. m. littoralis*; green: *M. m. mulatta*;  
14  
15 695 purple: *M. m. lasiotis*). The sizes of the areas are not proportional to the magnitude of the  
16  
17 696 numbers. (d) NJ tree including the 81 Chinese RMs derived from this study, the 26 captive  
18  
19 697 Chinese RMs from Zhong et al. [7] are indicated by blue dot.

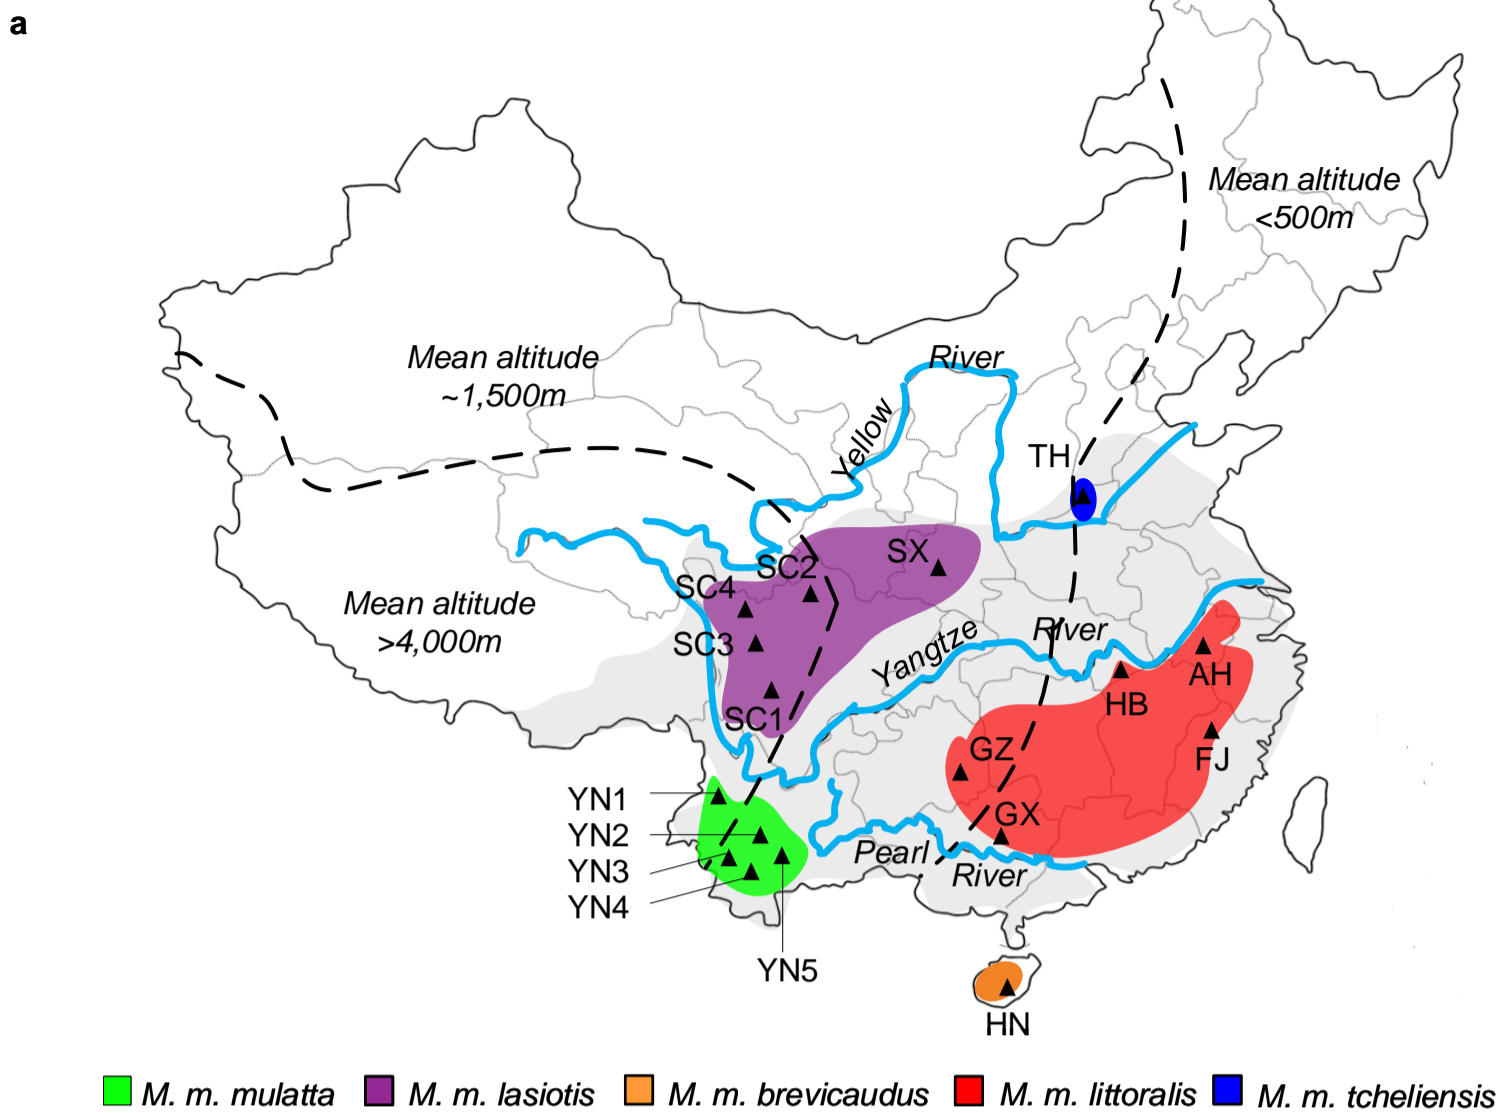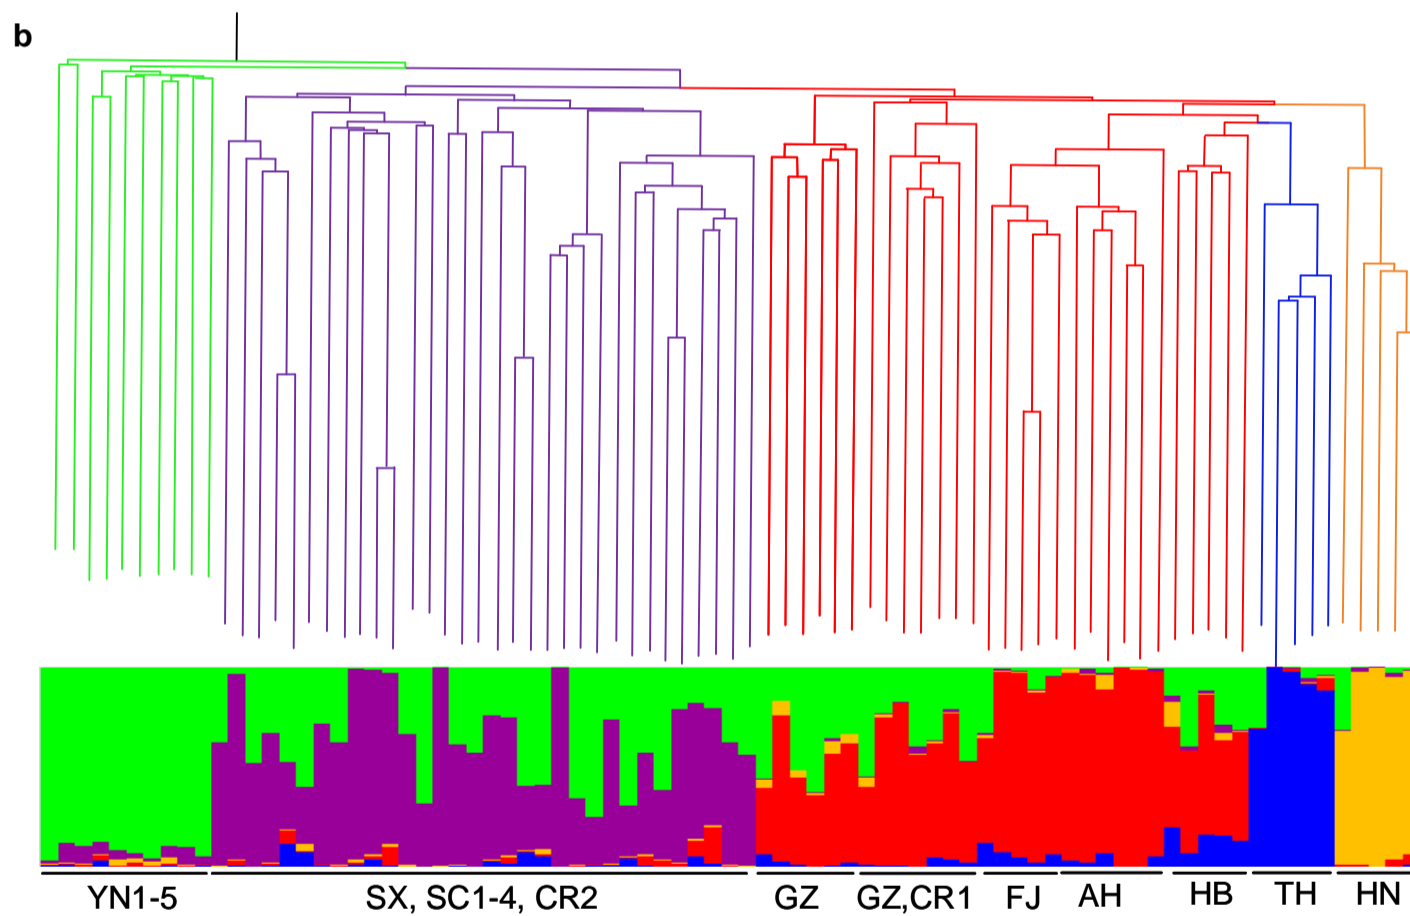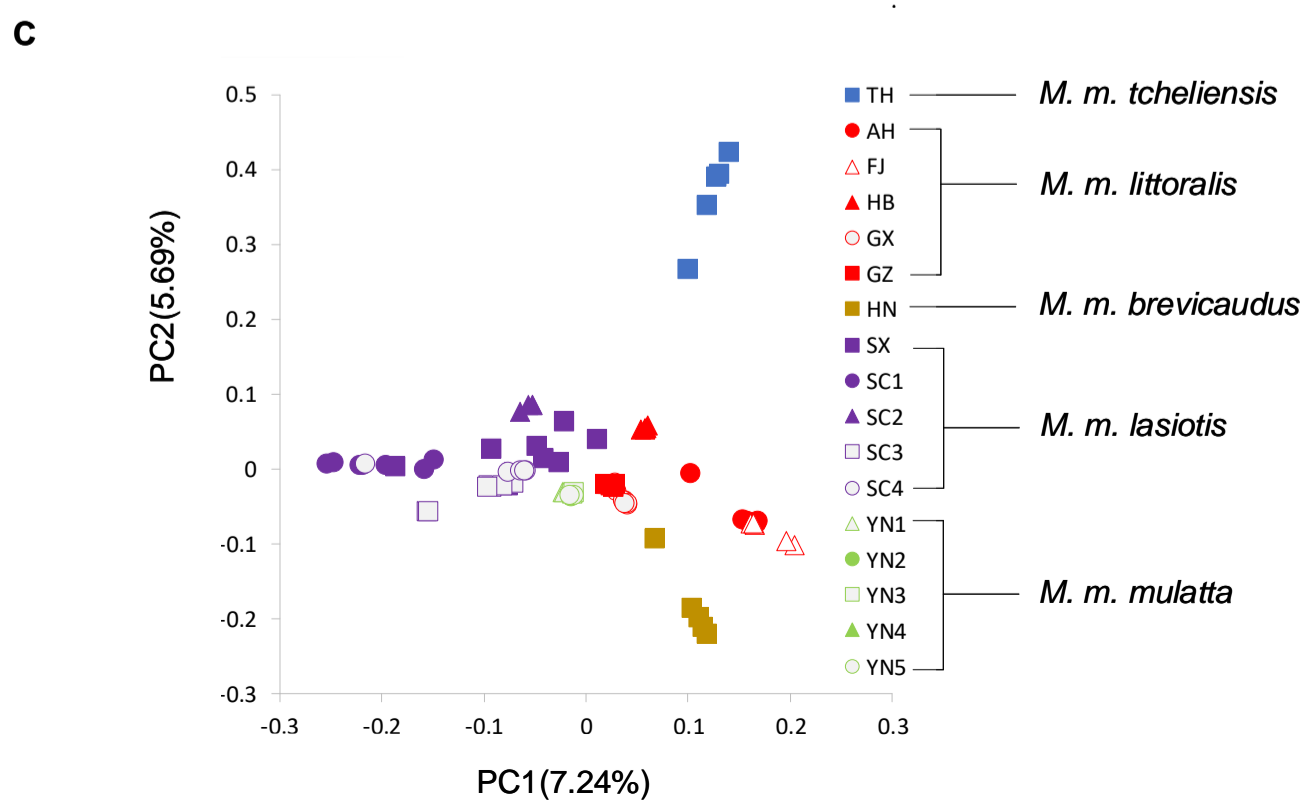

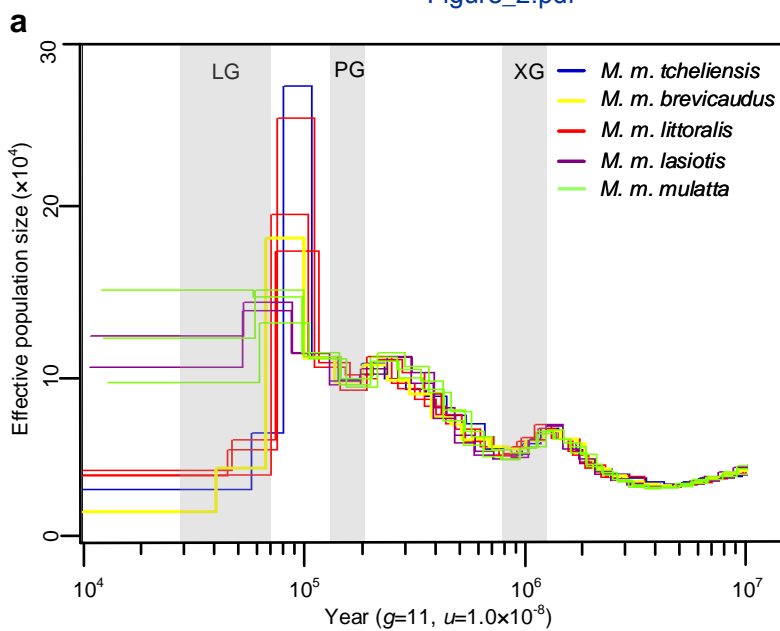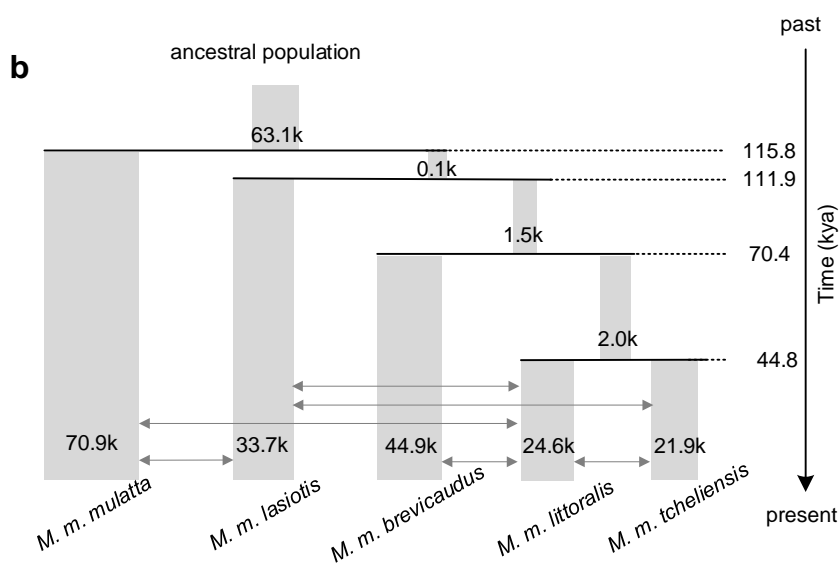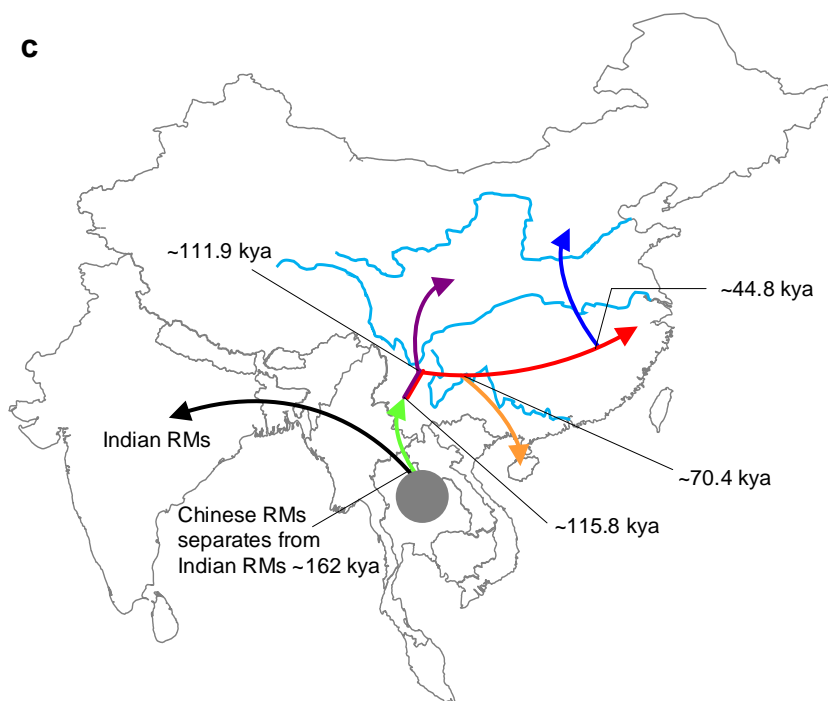

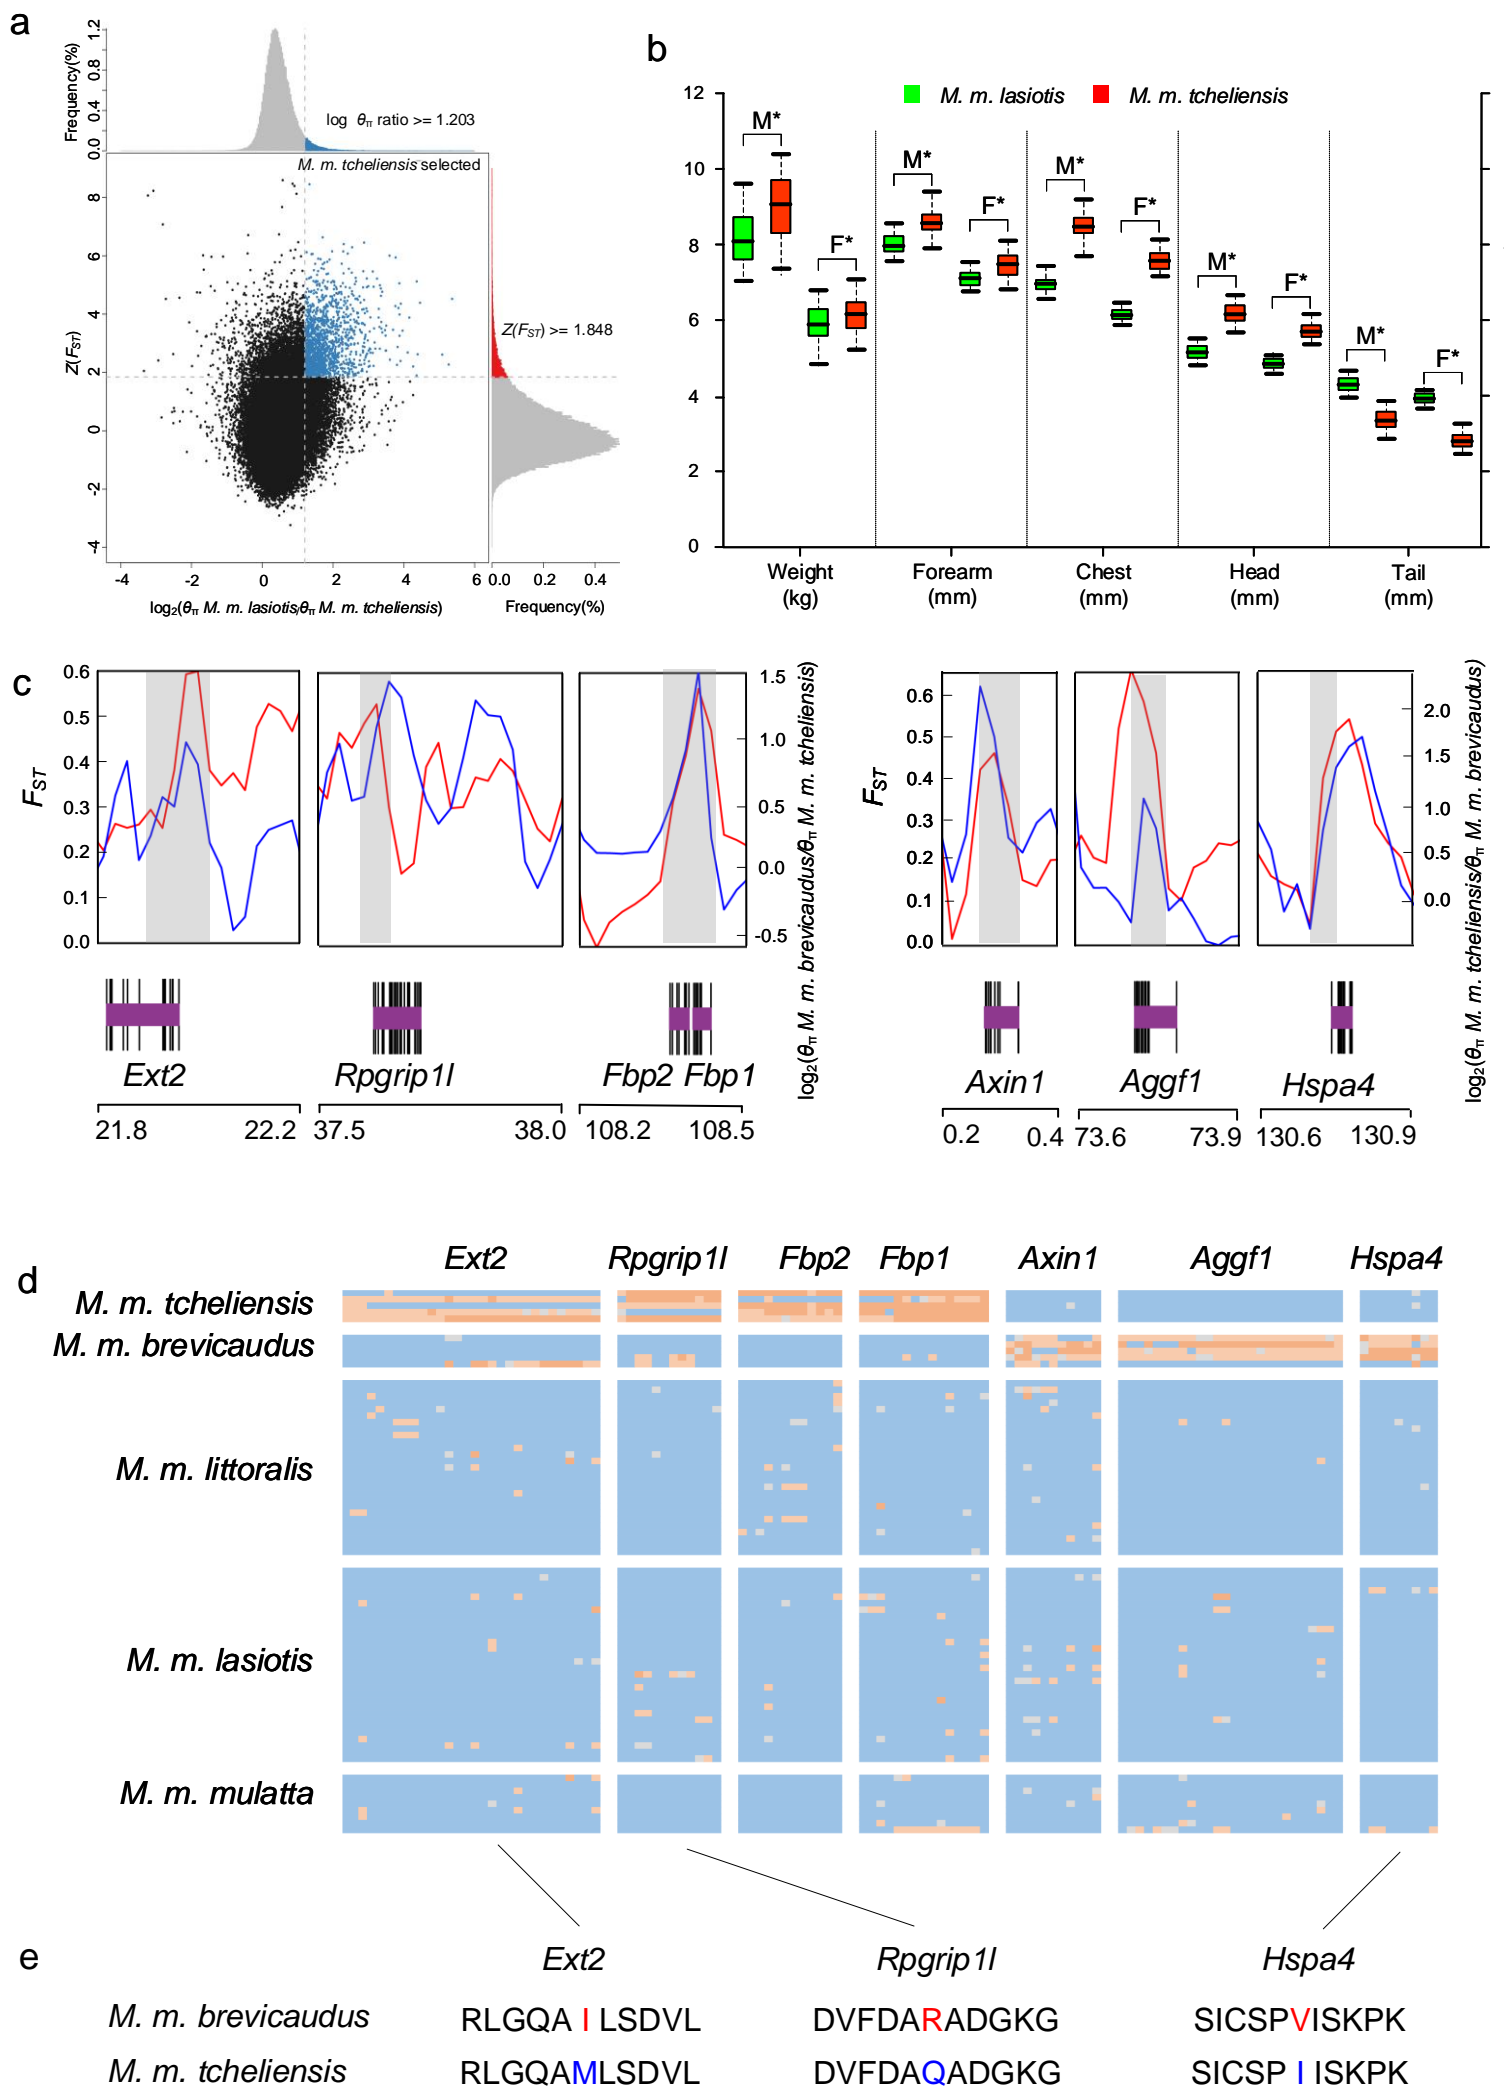

a

**UNC13D**

Human Reference **C A T C C T C C T C A C C T G C A G C C**

Human pathogenic SNP **. A . . . . . T . . . . .**

Macaque Reference **. C . . . . . C . . . . .**

Macaque pathogenic SNP **. C . . . . . T . . . . .**

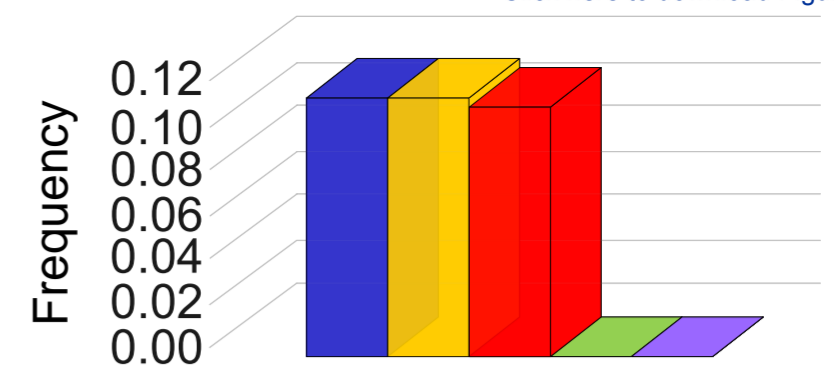

**BTD**

Human Reference **G G C A C T T A C T A C A T C C A A G T**

Human pathogenic SNP **. . . . . C . . . . . A . .**

Macaque Reference **. . . . . A . . . . . G . .**

Macaque pathogenic SNP **. . . . . C . . . . . G . .**

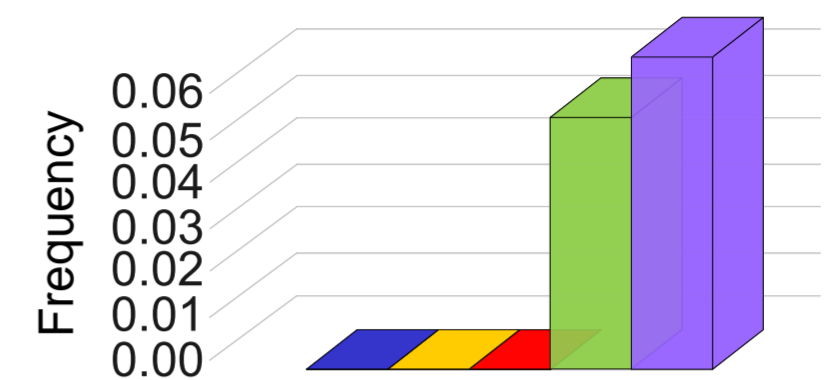

■ *M. m. tcheliensis* ■ *M. m. brevicaudus* ■ *M. m. littoralis* ■ *M. m. mulatta* ■ *M. m. lasiotis*

b

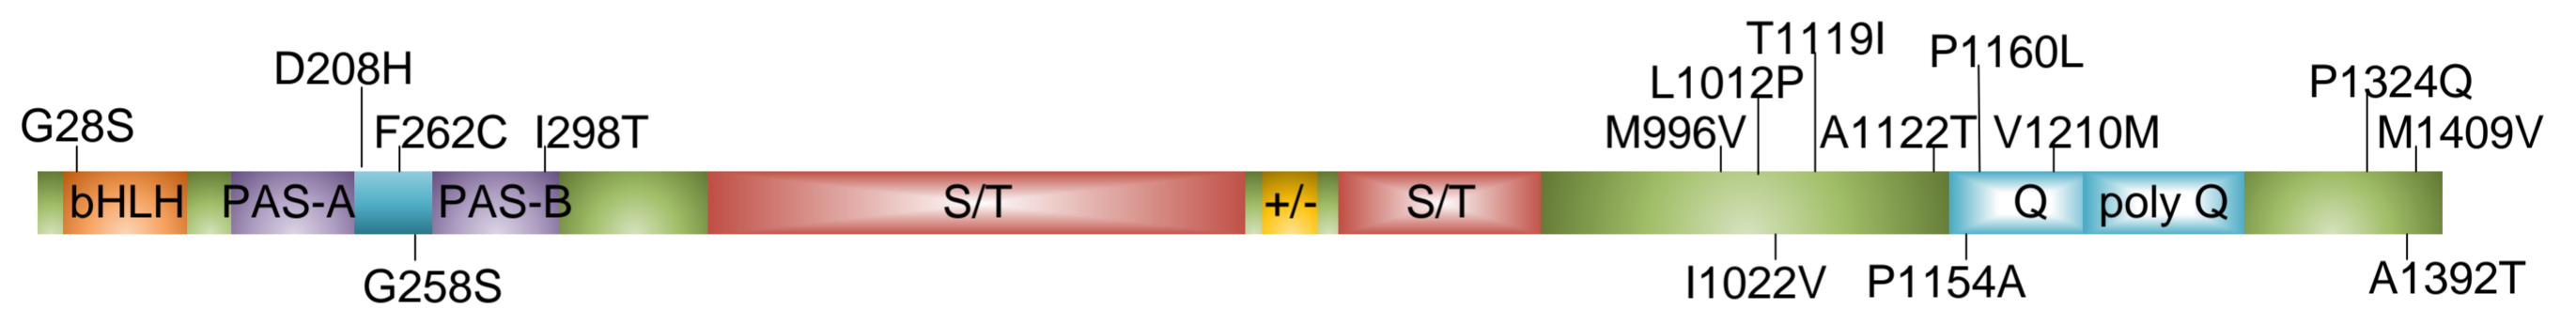

c

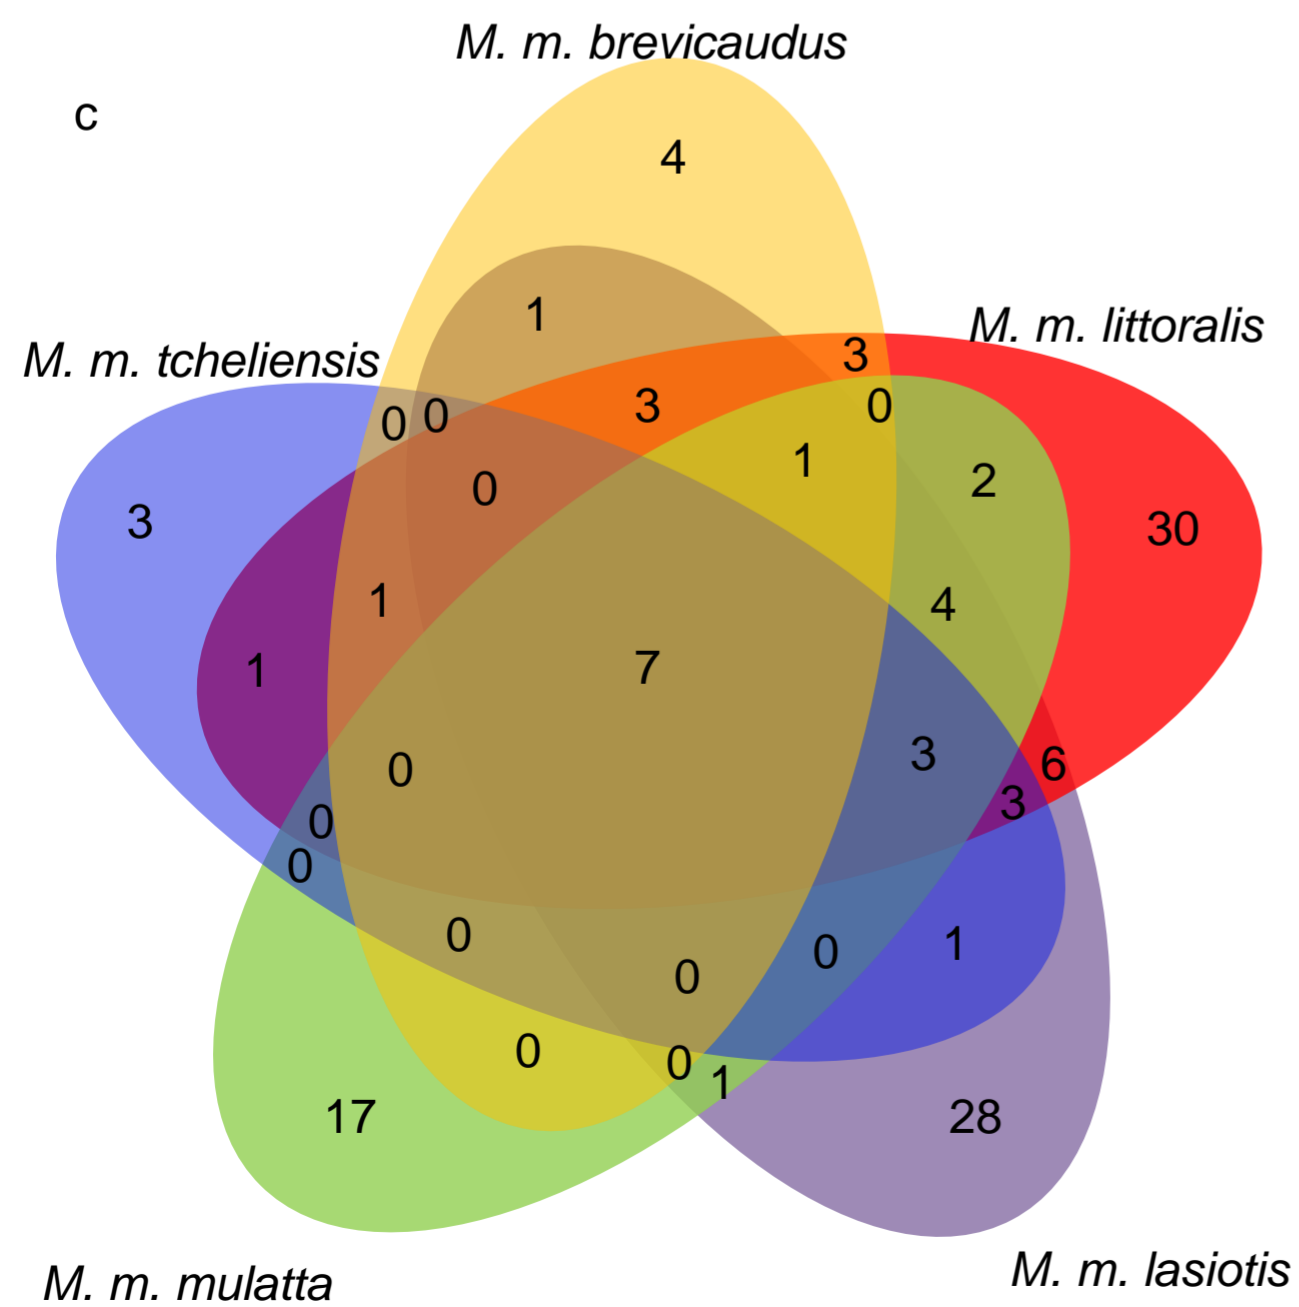

d

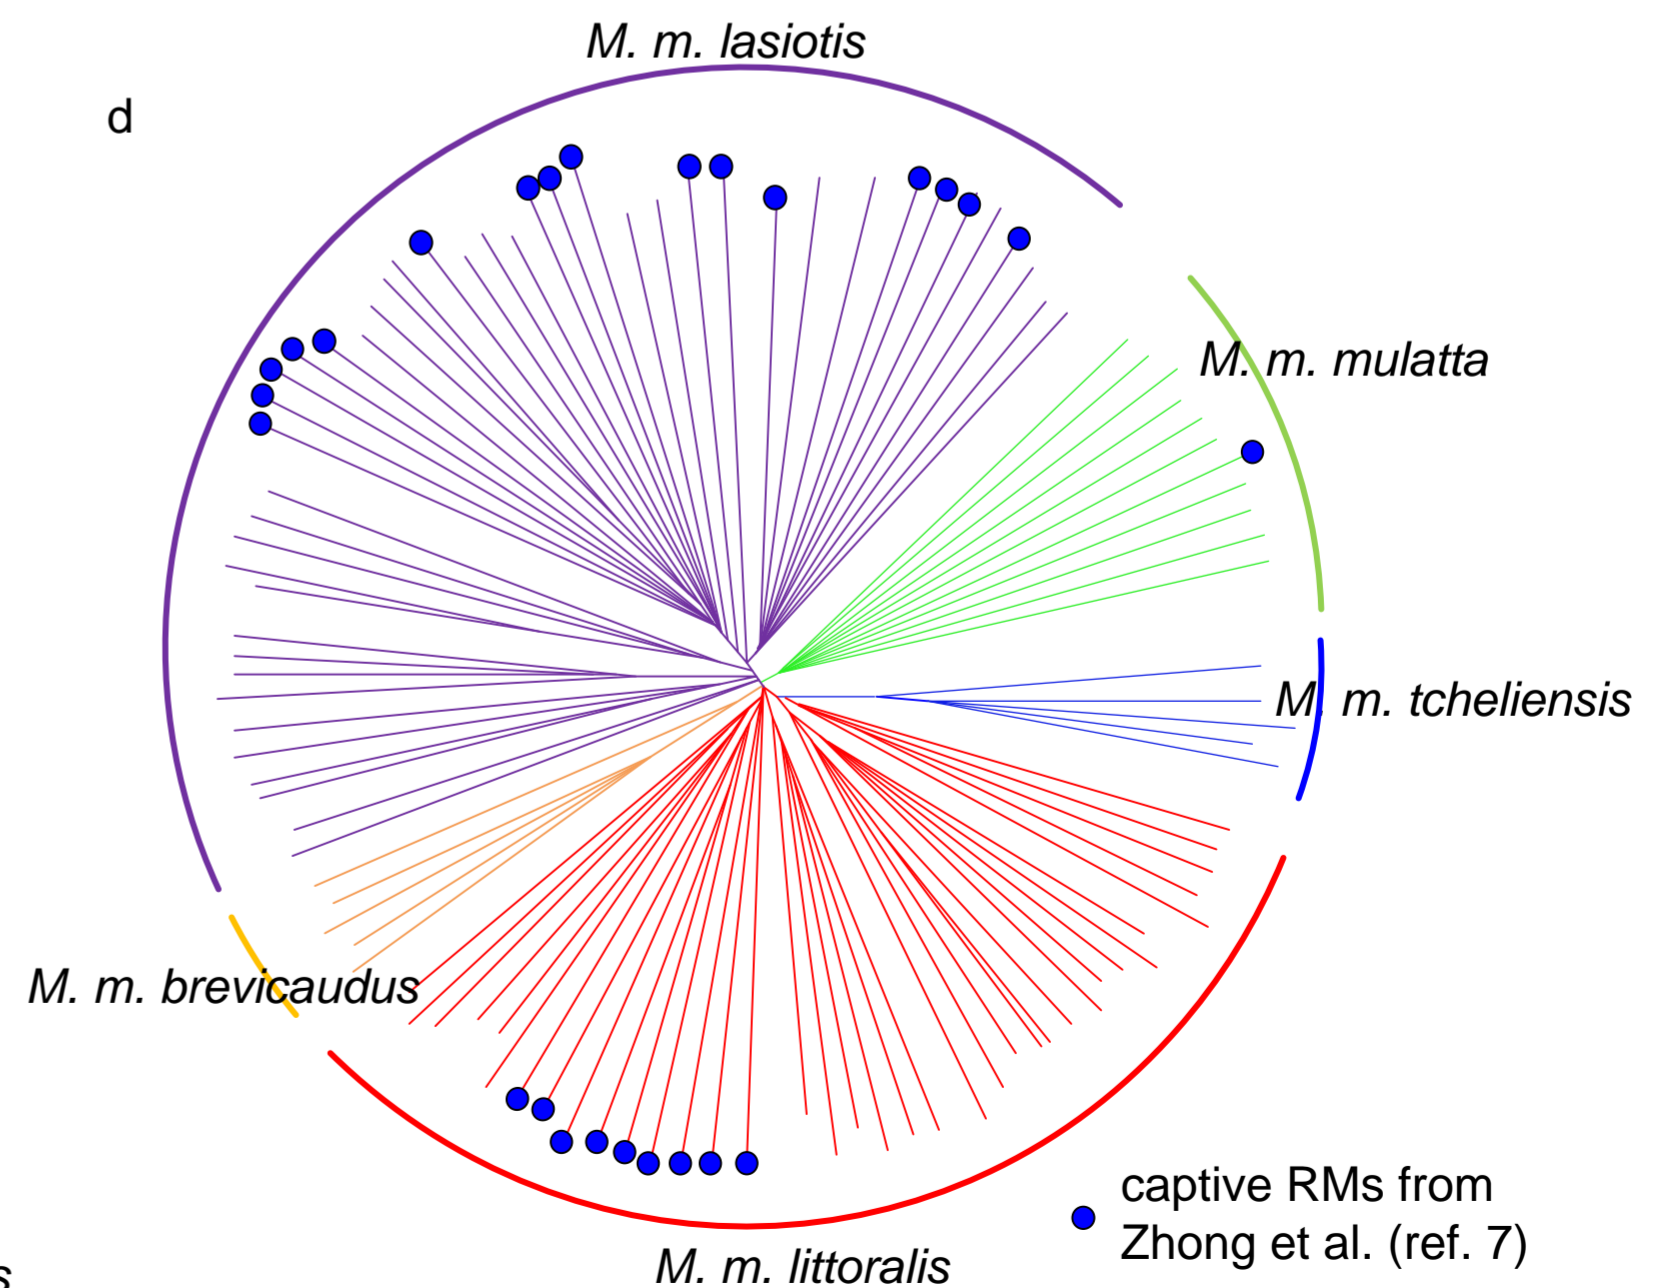



Click here to access/download  
**Supplementary Material**  
renamed\_d4adc.docx



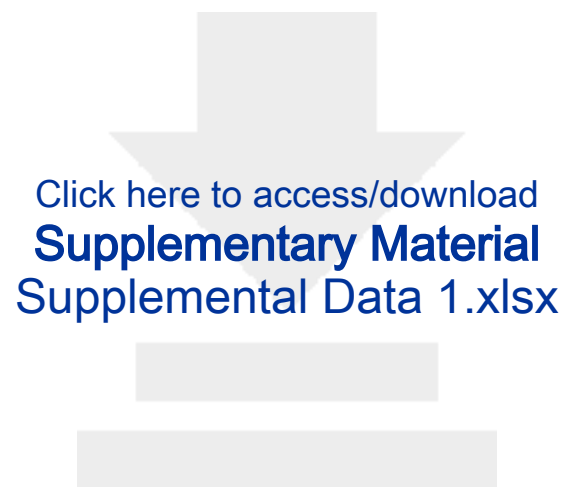

Click here to access/download  
**Supplementary Material**  
Supplemental Data 1.xlsx



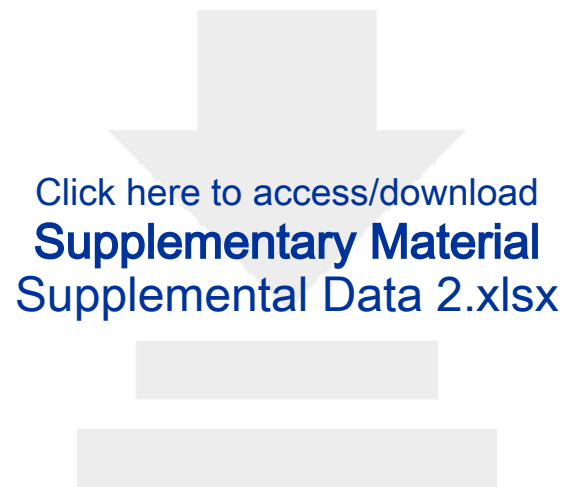

Click here to access/download  
**Supplementary Material**  
Supplemental Data 2.xlsx
